# Supplementary material
Source: PubMed Central journal article supplement (PMC11132257)

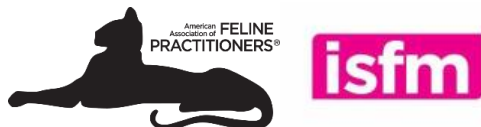

## ***AAFP (American Association of Feline Practitioners) e ISFM (International Society of Feline Medicine) –***

### ***Diretrizes para cuidados de enfermagem amigáveis aos felinos***

#### **Autores:**

**Hazel C Carney** DVM MS DABVP (Canino e Felino). *Co-Presidente das Diretrizes*

**Susan Little** DVM DABVP (felino) *Co-Presidente das Diretrizes*

**Dawn Brownlee-Tomasso** RVT

**Andrea M Harvey** BVSc DSAM (felino) DEVCIM-CA MRCVS

**Erica Mattox** CVT VTS (ECC)

**Sheilah Robertson** BVMS (Hons) PhD DACVA DECVAA CVA MRCVS

**Renee Rucinsky** DVM DABVP (felino)

**Donna Stephens Manley** DVM

O AAFP e o ISFM recebem com satisfação o endosso dessas diretrizes pela American Animal Hospital Association (AAHA).

**Cuidados de enfermagem:** O termo cuidado de enfermagem pode ter diferentes significados. Os autores destas Diretrizes de Cuidados de Enfermagem amigáveis aos felinos para AAFP (Associação Americana de Profissionais de Felinos) e ISFM (Sociedade Internacional de Medicina Felina) definem cuidados de enfermagem como qualquer interação entre o gato e a equipe veterinária (médico-veterinário, técnico ou enfermeiro, recepcionista ou outra equipe de apoio) na clínica veterinária, ou entre o gato e seu tutor em casa, que promove o bem-estar ou a recuperação de uma doença ou lesão e aborda o bem-estar físico e emocional do paciente. Os cuidados de enfermagem também ajudam o gato doente ou convalescente a se envolver em atividades nas quais seria incapaz de executar sem ajuda.

**Fundamentos das diretrizes:** O objetivo das Diretrizes é ajudar todos os membros da equipe veterinária a compreender os conceitos básicos da assistência de enfermagem, tanto na clínica quanto em casa. Isso inclui métodos para manter o paciente aquecido, confortável, bem nutrido, limpo e arrumado. As Diretrizes fornecem inúmeras dicas práticas obtidas dos muitos anos de experiência clínica dos autores e incentivam os membros de equipes veterinárias a observar os cuidados de enfermagem em felinos de maneira que antes não consideravam.

**Objetivo:** O objetivo principal dos cuidados de enfermagem amigáveis aos felinos é fazer com que o gato se sinta seguro e protegido ao longo de sua experiência médica.

## **A arte dos cuidados de enfermagem**

A medicina veterinária é uma combinação de ciência e arte. A ciência usa evidências e dados de pesquisas para guiá-la, enquanto a arte da cura depende de experiência clínica, observação, feedback direcionado ao paciente ou ao cliente e a capacidade de interpretar o estado emocional do paciente. A resposta comportamental do paciente ao tratamento é o foco central na arte do cuidado de enfermagem. Para fornecer suporte ideal a um gato doente, ferido ou em recuperação, a arte dos cuidados de enfermagem é tão importante quanto a ciência médica.

A maioria dos tutores pode detectar facilmente quais membros da equipe veterinária realmente se conectam e demonstram empatia com seus gatos. Os membros da equipe veterinária que aplicam a arte e a ciência dos cuidados de enfermagem veterinária não apenas oferecem cuidados de saúde ideais ao gato, mas também ganham a confiança e o apreço dos clientes da clínica. Envolver o tutor é um aspecto fundamental para o sucesso dos cuidados de enfermagem aos felinos e requer a educação do cliente, orientação e suporte por parte da equipe veterinária.

As Diretrizes para o Manuseio amigável aos felinos também publicadas pela AAFP (Associação Americana de Profissionais de Felinos) e ISFM (Sociedade Internacional de Medicina Felina) fornecem informações primárias essenciais sobre a importância de reduzir o estresse que os gatos experimentam antes, durante e após a visita veterinária.<sup>1</sup> Estas Diretrizes para Cuidados de Enfermagem amigável aos felinos complementam as recomendações das Diretrizes para o Manuseio amigável aos felinos, enfatizando a arte da medicina veterinária fornecida pela equipe veterinária na clínica e pelo tutor do gato em casa. O objetivo principal destas Diretrizes é fazer com que o gato se sinta seguro e protegido durante toda a sua experiência médica. Ao fazê-lo se sentir seguro e protegido, muitos desafios de lidar com o paciente felino diminuem ou desaparecem completamente (Figura 1).

Os membros da equipe veterinária que aplicam a arte e a ciência dos cuidados de enfermagem veterinária não apenas oferecerão cuidados de saúde ideais ao gato, mas também ganharão a confiança dos clientes.

### **Principais objetivos dos cuidados de enfermagem ao paciente felino**

- ❖ **Faça o gato sentir-se seguro e protegido no ambiente clínico e em casa após a alta**
- ❖ **Minimize o estresse para o paciente durante o tratamento na clínica e em casa**
- ❖ **Contribuir para a recuperação bem-sucedida de doenças, cirurgias e lesões ou outros tratamentos**

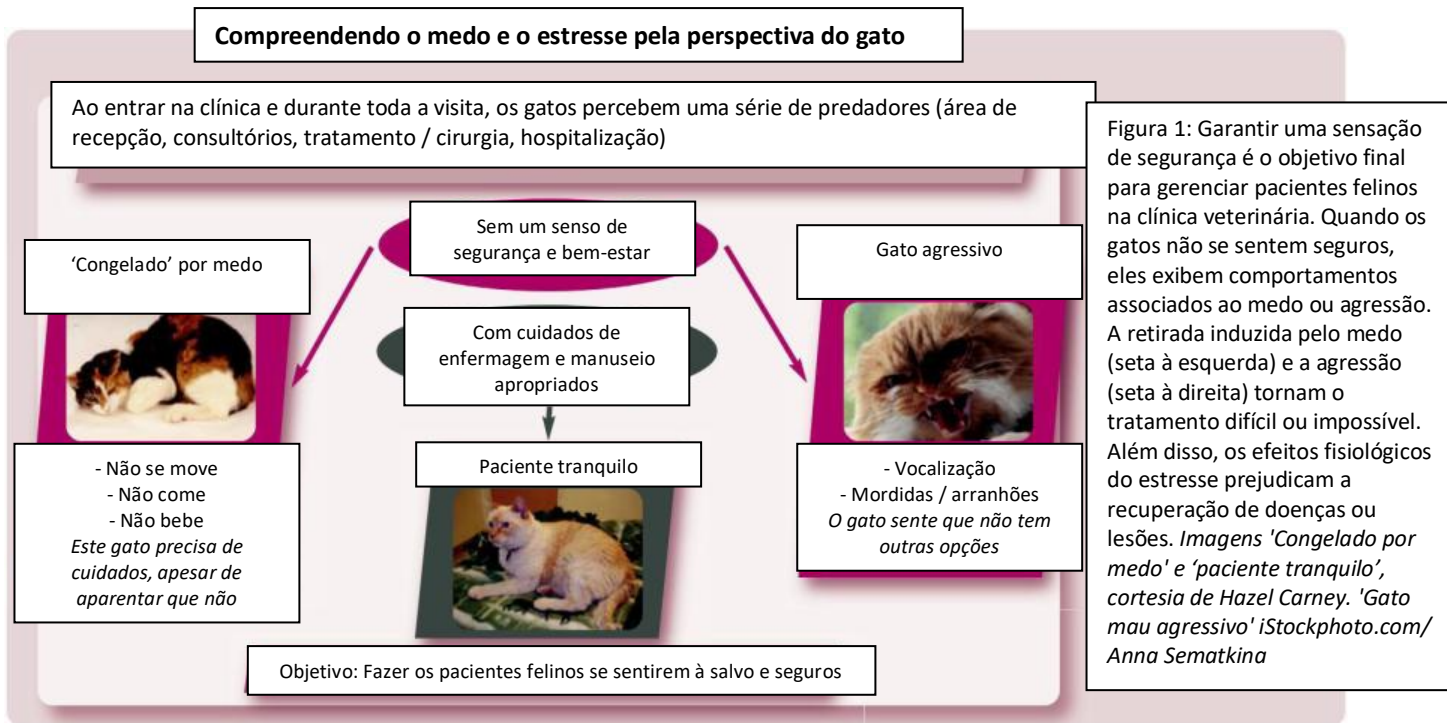

Figura 1: Garantir uma sensação de segurança é o objetivo final para gerenciar pacientes felinos na clínica veterinária. Quando os gatos não se sentem seguros, eles exibem comportamentos associados ao medo ou agressão. A retirada induzida pelo medo (seta à esquerda) e a agressão (seta à direita) tornam o tratamento difícil ou impossível. Além disso, os efeitos fisiológicos do estresse prejudicam a recuperação de doenças ou lesões. Imagens 'Congelado por medo' e 'paciente tranquilo', cortesia de Hazel Carney. 'Gato mau agressivo' iStockphoto.com/ Anna Sematkina

Estas Diretrizes contêm conceitos e métodos de cuidados de enfermagem que beneficiarão o médico veterinário e também outros membros da equipe veterinária, especialmente os técnicos / enfermeiros veterinários. Um número considerável de médicos-veterinários não se sente à vontade em trabalhar com gatos ou não considera o paciente felino sua primeira preferência. Um objetivo importante destas Diretrizes é fornecer recomendações práticas para médicos-veterinários e outros membros da equipe veterinária que consideram difícil trabalhar com gatos. Muitas pessoas que trabalham com felinos descobrirão que as Diretrizes abordam um território familiar. No entanto, os autores esperam fornecer informações úteis que até os clínicos mais experientes possam desfrutar.

A melhora clínica do paciente na clínica ou hospital é apenas um aspecto no sucesso do tratamento. A capacidade do tutor de fornecer a continuidade dos cuidados em casa contribuirá substancialmente para um bom resultado do caso. Portanto, um dos focos principais dessas diretrizes é como envolver o tutor no manuseio adequado do gato, tanto na clínica quanto em casa após a alta. A equipe veterinária que falha em fornecer orientações sobre os cuidados domiciliares ou em iniciar a comunicação com o tutor do gato após a alta pode comprometer até o melhor tratamento hospitalar.

## Fazendo o gato se sentir seguro e protegido

### Compreendendo o medo e o estresse da perspectiva do gato

### ***Antecipando situações estressantes***

Os gatos são notoriamente sensíveis a seus arredores e têm uma resposta bem desenvolvida de luta ou fuga. Essas respostas de autoproteção, normalmente essenciais à sobrevivência, podem ser prejudiciais em uma clínica veterinária, no ambiente doméstico ou quando persistem por um período prolongado. Circunstâncias desconhecidas (veja o quadro abaixo) que os gatos encontram em clínicas veterinárias podem levar aos efeitos adversos da ansiedade e do medo. Esses efeitos adversos suprimem comportamentos normais (como repouso e alimentação) e aumentam a vigilância, sinais ocultos e disfuncionais, como anorexia, vômito e diarreia ou até falta de eliminação.<sup>2,3</sup> Respostas fisiológicas indesejáveis ao estresse incluem hiperglicemia, concentrações séricas diminuídas de potássio, concentrações séricas elevadas de creatinina fosfoquinase, linfopenia, neutrofilia, resposta errática à sedação e anestesia, imunossupressão, hipertensão e sopros cardíacos.<sup>4-6</sup> Estas alterações podem complicar a avaliação clínica e o tratamento dos felinos e prolongar a hospitalização.

#### **Fatores estressores comuns para os gatos nas clínicas ou hospitais veterinários**

- Outros animais e humanos
- Barulhos (por exemplo equipamentos médicos, telefones, latidos de cães, conversação)
- Odores (por exemplo outros animais, desinfetantes)
- Uma gaiola hospitalar que não permita que o gato se esconda
- Pessoas não familiares para cuidarem do gato
- Alimentos e rotina de alimentação não familiares
- Sobrecarga sensorial em ambientes hospitalares agitados

Embora a equipe veterinária não possa eliminar todos os fatores estressores, pode identificar pelo menos alguns fatores a serem modificados ou eliminados. As Diretrizes para Manejo Amigável aos Felinos contêm mais informações sobre fatores ambientais que afetam gatos hospitalizados.<sup>1</sup>

### ***Reconhecendo o medo e a ansiedade***

O medo e a ansiedade nos gatos podem se manifestar primeiro como alterações na posição das orelhas, olhos e expressão facial, postura corporal, sudorese nos coxins e movimento da cauda. Gatos com medo podem tentar escapar. A vocalização (por exemplo, miar, rosar, sibilar, cuspir) pode indicar uma reação crescente ao estresse. Alguns gatos mostram comportamento abertamente agressivo, como morder, arranhar ou atacar. Outros respondem ao medo e à ansiedade 'congelando', quando se tornam imóveis, quietos e de olhos arregalados, ou se engajam em comportamentos deslocados, como limpeza frenética. Distinguir comportamentos associados ao medo e ansiedade daqueles associados à dor pode não ser fácil. As Diretrizes para Manejo Amigável aos Felinos contêm mais informações sobre o reconhecimento do medo e da ansiedade.<sup>1</sup>

### ***Respostas apropriadas ao gato medroso e ansioso***

Evitar a contenção excessiva do gato medroso é muito importante. Uma abordagem indelicada provavelmente aumentará a ansiedade do gato e tornará o manuseio ainda mais difícil. O médico-veterinário, os assistentes e o tutor do gato devem permanecer calmos e pacientes. A equipe veterinária deve ser flexível e disposta a adaptar a visita às necessidades de cada paciente. Se o gato estiver com medo e resistir ao manuseio, a equipe deve adotar uma abordagem alternativa para atingir os objetivos da visita. Isso pode incluir sedação ou um período em que a atividade médica cessa temporariamente,

para permitir que o gato se acalme. Se o comportamento do gato sugerir a presença de dor, por mais leve que seja, forneça analgesia e reavalie a resposta do gato.

Evitar a restrição excessiva do gato medroso é muito importante.

Uma abordagem indelicada provavelmente aumentará a ansiedade do gato e tornará o manuseio ainda mais difícil.

## **Benefícios da redução do estresse em gatos na clínica**

### ***Melhores resultados com o paciente***

A resposta favorável dos gatos a um análogo sintético do feromônio facial felino é um exemplo de como os cuidados de enfermagem podem melhorar os resultados dos pacientes em um ambiente hospitalar veterinário. Gatos hospitalizados com feromônio facial felino sintético aplicado a uma toalha em suas gaiolas hospitalares aumentaram significativamente seus comportamentos de auto-higienização e ingestão de alimentos.<sup>7</sup>

A exposição dos gatos ao feromônio facial felino sintético durante as atividades de pré-medicação antes da anestesia também tornou os gatos mais calmos no momento do cateterismo venoso.<sup>8</sup>

As complicações anestésicas são mais comuns em gatos do que em cães e estão associadas ao estado de saúde, idade, peso, tipo de procedimento e urgência.<sup>9,10</sup> A atenção cuidadosa à avaliação e manejo do paciente antes da anestesia pode reduzir as complicações perioperatórias. No entanto, a resposta do gato ao medo e à ansiedade pode complicar ou até impedir uma avaliação pré-anestésica completa. Reduzir ou prevenir o estresse em gatos hospitalizados pode facilitar o exame pré-cirúrgico e os testes laboratoriais pré-operatórios, melhorando a segurança do paciente.

### ***Tutores satisfeitos e o aumento das visitas de felinos***

Estudos recentemente publicados revelaram uma subutilização da assistência médica veterinária para gatos nos EUA e no Canadá. Embora os tutores de gatos geralmente tenham um nível superior de conhecimento em relação aos tutores de cães, é menos provável que eles levem seus gatos ao veterinário do que os tutores de cães.<sup>11</sup> Os grupos focais descobriram que um dos fatores mais importantes que contribuem para menos visitas felinas aos veterinários são os sinais de estresse exibidos pelo gato.<sup>12</sup> Tanto a dificuldade de colocar o gato na caixa de transporte, quanto a vocalização e os sinais físicos de tensão exibidos pelos gatos enquanto estão na sala de espera do hospital veterinário e durante os exames, gera angústia nos tutores. Como resultado, muitos tutores evitam os aspectos desagradáveis da visita ao médico-veterinário simplesmente não levando seu gato até ele.

Melhorar a experiência do gato e do tutor antes, durante e após a visita à clínica veterinária, incluindo a hospitalização, incentivará os tutores a levar seus pets com mais frequência para exames de bem-estar e mais cedo no curso das doenças.

### ***Maior segurança e satisfação no trabalho para a equipe veterinária***

A agressão é um dos problemas de comportamento felino mais comumente relatados. O medo e a dor encontrados na clínica veterinária são fontes comuns de agressão felina. Os ataques à equipe veterinária geralmente envolvem mordidas ou arranhões. A taxa de infecção em lesões não tratadas por ataques de gatos é alta, variando de 30 a 50%.<sup>13,14</sup> As lesões nas mãos são especialmente propensas a infecções.

Melhorar a experiência de hospitalização do paciente felino diminui a agressão baseada no medo, e um melhor reconhecimento e controle da dor reduzem a agressão baseada na dor.

Diminuir o medo e a ansiedade do gato hospitalizado tem outros benefícios. O manuseio e o alojamento adequado dos gatos reduzem o estresse não apenas em pacientes felinos, mas também na equipe veterinária. Os funcionários podem experimentar maior satisfação no trabalho se os pacientes mostrarem

sinais de melhor bem-estar, melhor resolução de casos e menos comportamento negativo induzido pelo estresse. Finalmente, reduzir o tempo necessário para lidar com gatos indóceis e não cooperantes melhora a eficiência do tratamento e o fluxo de trabalho na rotina veterinária.

#### **Feromônios faciais beneficiam gatos em todas as fases da visita à clínica veterinária**

Um estudo da Faculdade de Medicina Veterinária da Universidade do Estado de Ohio descobriu que a exposição de gatos clinicamente doentes a um feromônio facial felino sintético tópico aumentou significativamente o comportamento de esfregar a face, auto-higienização, caminhada e interesse em comida em comparação com a resposta em gatos que receberam um placebo. Os gatos também comiam significativamente mais em 24 horas se tivessem acesso a uma caixa de transporte na qual pudessem se esconder e o feromônio facial felino estivesse no ambiente.<sup>7</sup> Além disso, a exposição dos gatos ao feromônio facial felino durante a pré-medicação para anestesia deixou os gatos mais calmos no momento da punção venosa em comparação com a resposta em gatos expostos a placebo.<sup>8</sup> Estes resultados sugerem que o tratamento com feromônio facial felino e a provisão de um local privado para descanso são benéficos em gatos hospitalizados. O spray de feromônio facial felino sintético é útil em gaiolas hospitalares, mesas e cobertores, enquanto um difusor de ambiente permeia melhor as áreas de alojamento dos gatos.

#### **Cuidados de enfermagem na clínica veterinária: uma visão pela perspectiva do gato**

Ações que reduzem o estresse da perspectiva do gato à medida que isso progride podem ser implementadas em cada local dentro da clínica veterinária (veja a caixa abaixo).

## Recomendações de cuidados de enfermagem aplicáveis em cada local em uma típica clínica veterinária

### Consultório

- Mantenha a sala e a mesa aquecidas, com uma superfície antiderrapante para o gato
- Distraia e recompense com alimentos ou brincadeiras
- Forneça orientação aos tutores para uma interação apropriada com o gato
- Leia a personalidade do gato e ajuste seu comportamento para atender às necessidades dele
- Verifique se todos os suprimentos e equipamentos necessários estão disponíveis na sala e evite o tráfego desnecessário de entrada e saída da sala
- Use feromônios sintéticos calmantes no ambiente

### Áreas de diagnóstico e tratamento

- Escolha o local mais silencioso e menos perturbador para os procedimentos; pode ser o consultório ou a área de tratamento
- Evite a exposição a outros animais em áreas hospitalares comuns, como radiologia ou sala de tratamento

### Hospitalização

- A gaiola hospitalar deve ser grande o suficiente para acomodar um lugar para se esconder e para que a caixa de areia fique longe da comida, cobertores e água
- Forneça cobertores, brinquedos, comida e granulado higiênico que sejam familiares e remova-os somente quando estiverem sujos
- Usar feromônios sintéticos calmantes na gaiola hospitalar aumentará o comportamento de auto-higienização e a ingestão de alimentos
- Idealmente, separar as internações de gatos e cães. Outros cães e gatos devem estar fora da vista sempre que possível
- Considere o microclima de cada gaiola hospitalar com base nas necessidades do paciente. Gatos doentes, geriátricos, sedados e pediátricos requerem uma temperatura ambiente mais alta
- Considere reduzir os níveis de luz para incentivar o descanso e acalmar os gatos ansiosos
- Para gatos receptivos, forneça uma interação positiva (escovação, brincadeira ou carinho) que não esteja relacionada ao tratamento médico

### Recepção

- A seleção de uma boa caixa de transporte e aclimação ideais diminuirão o estresse
- Forneça uma superfície elevada (mesa, cadeira, prateleira, parapeito da janela) para a caixa de transporte
- Considere usar painéis ou plantas para criar áreas separadas para cães e gatos nas salas de espera
- Considere a colocação imediata de gatos em um consultório, quando possível
- Use feromônios sintéticos calmantes no ambiente

### Cirurgia

- Faça o possível para minimizar o estresse pré-cirúrgico; por exemplo, mantenha o gato isolado até depois da indução, mantenha algo familiar com ele, crie um ambiente tranquilo, níveis baixos de ruído na área pré-cirúrgica (conversa, aspiração, rádio, etc.)
- O controle da temperatura ambiente e do corpo, bem como a dor e a hidratação, são essenciais
- A observação cuidadosa do paciente também é essencial (a maioria das mortes relacionadas à anestésicos ocorre durante a recuperação)

### Em todos os ambientes

- Minimizar o barulho
  - Mantenha os cães em áreas separadas
  - Minimizar o tráfego
- Mantenha as caixas de transporte elevadas do chão
- Permita que o gato se esconda, quando possível

## Considerações para a equipe veterinária

### ***Use uma abordagem de equipe***

Monitorar e responder adequadamente a qualquer evidência de estresse em um paciente felino em todas as etapas da visita ao hospital é uma abordagem que ajudará a melhorar a segurança e a eficiência dos funcionários e tutores de gatos. Para minimizar o estresse do paciente, cada membro da equipe veterinária desempenha um papel na experiência do gato desde o momento em que entra na porta até sair da clínica e até depois no monitoramento dos cuidados domiciliares. Toda a equipe veterinária deve entender o que faz a visita de um paciente transcorrer sem problemas e sem contratempos. Este conjunto de responsabilidades inclui educar os tutores sobre como transportar seus gatos sem estresse para a clínica veterinária, utilizando técnicas de exame *cat friendly*, reconhecendo padrões de comportamento felino e criando um ambiente familiar de baixo estresse para o paciente.

A equipe veterinária deve ter um interesse comum na prática de técnicas de manuseio seguras e eficazes, no compartilhamento de conhecimentos para manter um alto nível de prestação de serviços e na criação de uma cultura de melhoria contínua.

### ***Otimizar o valor do técnico ou enfermeiro veterinário***

O técnico / enfermeiro veterinário desempenha um papel vital dentro da equipe. O envolvimento do técnico pode ajudar a melhorar a eficiência e a produtividade no gerenciamento dos casos felinos. Quando empregados em todo o seu potencial, os técnicos podem realizar muitas tarefas normalmente executadas pelo médico-veterinário e delegar determinadas tarefas a outros membros da equipe. Um técnico experiente entende as necessidades básicas do gato, o comportamento felino normal, processos de doenças felinas e sinais clínicos sutis que os tutores podem ignorar. Para muitos técnicos, a comunicação eficaz com os tutores é uma competência essencial e uma habilidade que aumenta seu valor quando o tempo do médico-veterinário é limitado. Ao manter um diálogo aberto com o tutor do gato, o técnico está bem posicionado para alertar o médico-veterinário sobre quaisquer preocupações que o tutor possa ter em relação ao gato.

Cada membro da equipe veterinária desempenha um papel na experiência do gato desde o momento em que entra na porta até sair da clínica e até depois no monitoramento do atendimento domiciliar.

## Recomendações para reduzir o estresse na área de recepção

- ❖ Instrua os funcionários da recepção a fornecer sugestões aos tutores sobre o melhor design da caixa e transporte do paciente (consulte as Diretrizes para manuseio de felinos para obter detalhes adicionais).<sup>1</sup>
- ❖ Forneça uma superfície elevada (por exemplo, mesa, prateleira, cadeira, bancada) para manter as caixas de transporte fora do chão.
- ❖ Separe os cães dos gatos ou minimize o tempo na sala de espera para evitar encontros entre pacientes caninos e felinos.
- ❖ A Figura 2 mostra os recursos de uma área de recepção adequada para gatos.



### Recursos de uma área de recepção *cat friendly*

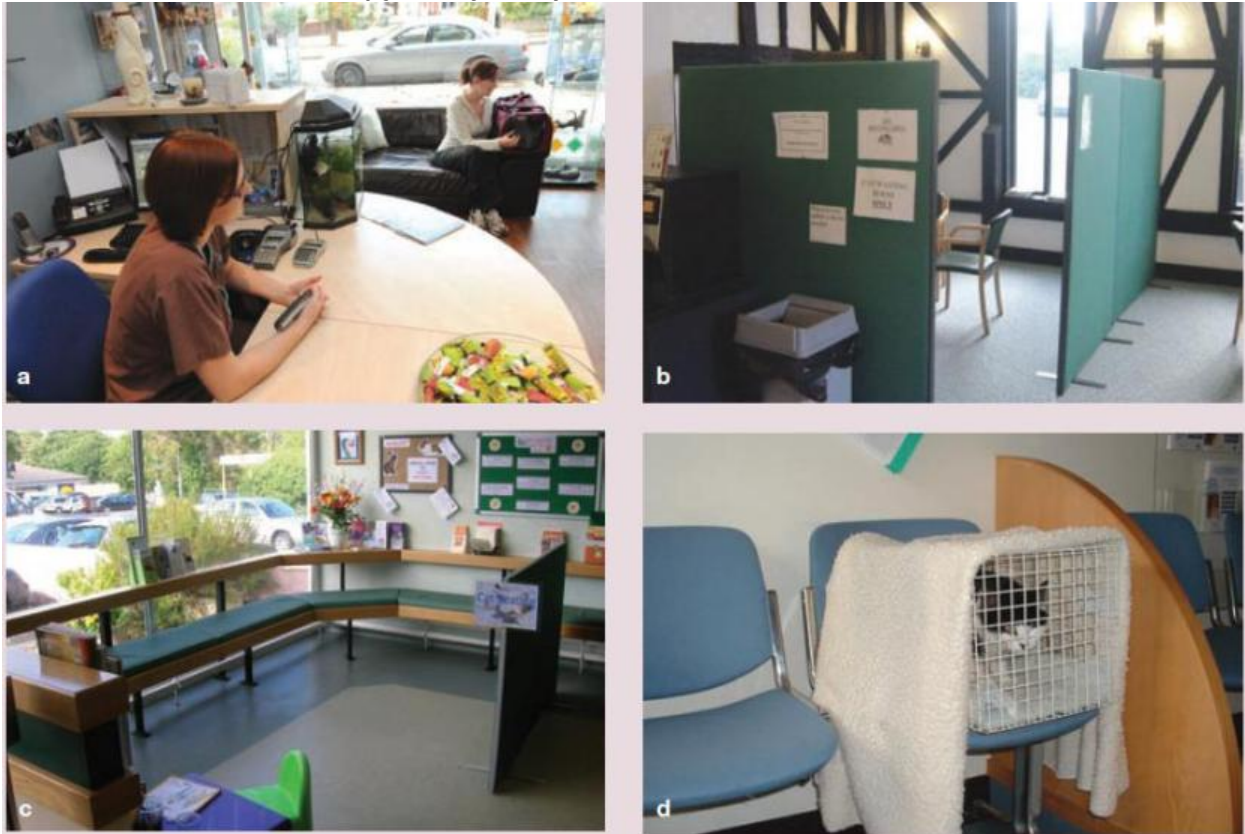

Figura 2 (a) O pessoal da recepção é facilmente acessível ao tutor do gato para responder a perguntas ou preocupações. (b) A sala de espera inclui uma área separada para os tutores que desejam privacidade adicional ou isolar seus gatos de outros animais ou clientes. (c) O banco permite que a caixa de transporte fique elevada e que fique ao lado do tutor. (d) Uma toalha colocada sobre a caixa de transporte fornece um esconderijo improvisado na área de recepção. *Imagens cortesia de FAB / ISFM*

### Recomendações para reduzir o estresse no consultório

- ❖ Forneça uma sala quente e silenciosa com uma superfície de exame confortável e antiderrapante.
- ❖ Garanta que todos os suprimentos e equipamentos necessários estejam imediatamente disponíveis para evitar tráfego desnecessário dentro e fora da sala e interrupção do exame.
- ❖ Avalie a personalidade e o temperamento do gato no momento da apresentação e ajuste a abordagem de acordo.
- ❖ Ofereça orientações sobre como o tutor pode interagir adequadamente com o paciente durante o exame (Figura 3).

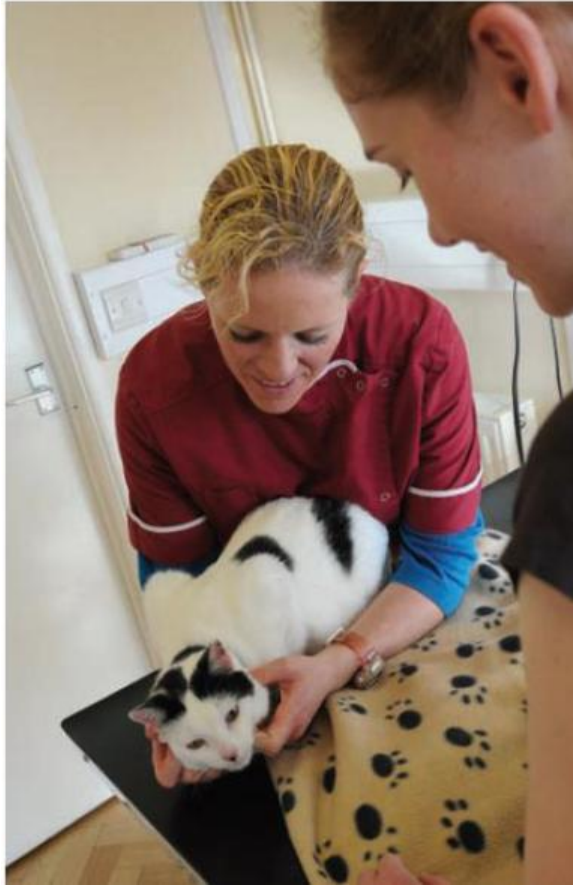

Figura 3 A presença do tutor durante o exame pode ajudar a minimizar a ansiedade do gato em resposta ao estresse do processo ou do ambiente. *Cortesia de FAB / ISFM*

### Recomendações para reduzir o estresse durante o exame físico

- ❖ As abordagens física e mental da equipe veterinária são essenciais para uma interação bem-sucedida com os gatos. Seja paciente, calmo, positivo e confiante.
- ❖ Ter tempo com pacientes felinos é realmente mais eficiente. Uma abordagem apressada pode criar ansiedade no paciente ou resultar em um exame ou tratamento incompleto. Se o gato permanecer calmo e relaxado durante o exame, seu tutor ganhará confiança no médico-veterinário.
- ❖ Observe os registros médicos do paciente para saber quais abordagens funcionaram ou não anteriormente.
- ❖ Abra a porta da caixa de transporte ou remova a parte superior para permitir que o gato saia por conta própria. Isso dará a ele uma sensação de controle e segurança. Evite a remoção forçada do gato de dentro da caixa de transporte. Alimentos ou brinquedos podem estimular a saída dos que não fazem isso voluntariamente.
- ❖ Examine o gato onde ele quiser ser examinado. Pode ser na mesa de exame, no chão, na balança ou na caixa de transporte.
- ❖ O gato pode perceber alguém olhando diretamente em seus olhos como uma ameaça. Piscar devagar transmite confiança e cordialidade.<sup>15</sup>
- ❖ Se um gato ficar tenso ou agitado, interrompa temporariamente o exame e permita que ele relaxe. Em uma rotina movimentada, é frequente não praticar essa abordagem simples.

- ❖ A coisa mais importante a ser lembrada ao examinar um gato é não exagerar na contenção forçada ou na correção do comportamento resistente. Gatos que exibem pequenas demonstrações de ansiedade, como inquietação, podem responder melhor se o médico-veterinário continuar o exame de maneira neutra e deliberada.
- ❖ Sempre procure uma oportunidade de recompensar o comportamento positivo com um alimento ou carinho. Isso incentiva o gato a relaxar. Comportamentos positivos podem ser sutis, como uma mudança na expressão facial ou relaxamento da tensão corporal.

Ter tempo com pacientes felinos melhora a eficiência. Uma abordagem apressada pode criar ansiedade no paciente ou resultar em um exame ou tratamento incompleto.

### Recomendações para reduzir o estresse nas áreas de diagnóstico e tratamento

Os gatos podem sentir dor e angústia consideráveis devido a procedimentos de diagnóstico ou emergência, como punção venosa repetida, cistocentese ou colocação de um cateter central de grande calibre.<sup>16</sup> O efeito dessas intervenções pode ser cumulativo e aditivo quando o mesmo procedimento é repetido ou se vários procedimentos diferentes são executados em sequência. O uso de analgésicos como a buprenorfina transmucosa pode facilitar muito a execução dessas tarefas. Se a contenção física adequada falhar, se o gato já estiver com dor ou se a intervenção necessária for repetida ou dolorosa (por exemplo, desbridamento de feridas, bandagem), sedação química ou anestesia geral combinada com agentes analgésicos são apropriados.

Dicas para reduzir o estresse durante o diagnóstico e tratamento incluem:

- ❖ **Localização:** Escolha uma área tranquila para executar procedimentos diagnósticos ou terapêuticos.
- ❖ **Posicionando o paciente:** Coloque o gato em uma superfície macia e antiderrapante e na posição mais natural para o procedimento planejado. Por exemplo, execute cistocentese na posição mais confortável para o gato. Isso pode ser na posição em pé ou decúbito lateral, ao invés do decúbito dorsal.
- ❖ **Feromônio facial felino:** O uso de feromônio facial felino sintético em gaiolas hospitalares, mesas ou cobertores nas salas de procedimentos e nas áreas de hospitalização 10 a 15 minutos antes de um procedimento produz um efeito calmante.<sup>8</sup>
- ❖ **Punção venosa:** As veias jugular, cefálica ou safena medial são escolhas apropriadas para a coleta de sangue. A colocação do cateter na veia safena medial é uma boa opção para procedimentos curtos e coleta de sangue. O posicionamento do gato para punção venosa da veia safena medial geralmente requer menos contenção e pode ser o mais confortável para muitos gatos (Figura 4). Normalmente, não é necessário fazer tricotomia, tornando o procedimento mais rápido, removendo uma etapa que pode alarmar ou perturbar o gato.
- ❖ **Posicionamento do cateter intravenoso:** Evite múltiplas punções venosas colocando um cateter intravenoso (IV) para amostras repetidas de sangue, fluidoterapia e / ou tratamentos intravenosos, ou caso seja necessário o acesso de emergência.

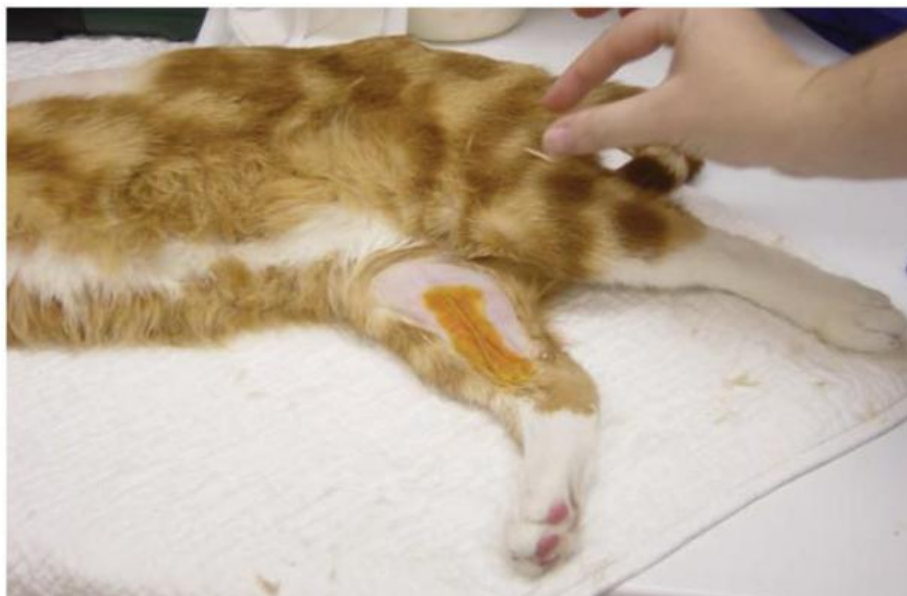

Figura 4 A colocação do cateter na veia safena medial é uma boa opção para procedimentos curtos e coleta de sangue. *Cortesia de Sheilah Robertson*

A aplicação tópica de cremes anestésicos locais para dessensibilizar a pele pode facilitar a colocação do cateter em situações não emergenciais. Estão disponíveis dois anestésicos tópicos, lidocaína em uma formulação encapsulada em lipossomas e uma mistura eutética de lidocaína e prilocaína. Uma absorção sistêmica mínima ocorre após a aplicação de qualquer um dos produtos.<sup>17</sup> Use uma quantidade mínima de esparadrapo para fixar os cateteres. Verifique o esparadrapo e os curativos com frequência para garantir que não fiquem muito apertados e não encolham caso fiquem molhados. Considere suturar cateteres jugulares no local e cobri-los com uma pequena quantidade de curativo elástico e autoadesivo.

- ❖ **Administração de fluidos subcutâneos:** O aquecimento de fluidos subcutâneos (SC) à temperatura corporal do gato pode diminuir o desconforto associado à sua administração. O aquecimento geralmente é feito usando um microondas ou banho-maria. Cada clínica veterinária deve desenvolver um protocolo para atingir a temperatura correta que evite queimar o paciente. Para determinar o protocolo de rotina, pegue uma bolsa de fluido armazenada em temperatura ambiente, abra o acesso e coloque-a na vertical em um recipiente para evitar que derrame. Coloque a bolsa de fluido no microondas em intervalos de 15 segundos. Como a bolsa possui uma forma irregular, agite o conteúdo após cada ciclo e insira um termômetro pelo acesso aberto até atingir uma temperatura de aproximadamente 37,8 – 38,9°C. Registre a configuração de energia e o tempo necessário para atingir a temperatura desejada em um local acessível, como próximo ao microondas ou em um protocolo escrito para terapia com fluidos subcutâneos.
- ❖ **Evite o contato com outros animais:** Isso inclui fotos ou modelos realistas de animais (as ilustrações são preferíveis).

## Recomendações para reduzir o estresse perioperatório

❖ Faça o possível para minimizar a exposição do gato ao estresse pré-cirúrgico:

- Mantenha o gato isolado em local tranquilo até após a indução;
- Forneça um objeto familiar, como cobertores ou um brinquedo de casa (Figura 5a; também apropriado para o pós-cirúrgico);
- Crie um ambiente calmo, minimizando os níveis de ruído ambiente, conversação ou barulho de equipamentos e eletrodomésticos;
- Use feromônio facial felino sintético na gaiola hospitalar do gato e na sala de procedimentos.
- Mantenha o ambiente perioperatório e a temperatura corporal adequados e garanta controle adequado da dor e hidratação (Figura 5b).
- Monitore o paciente de perto durante a recuperação, que é quando ocorre a maioria das mortes relacionadas aos anestésicos.<sup>10</sup>

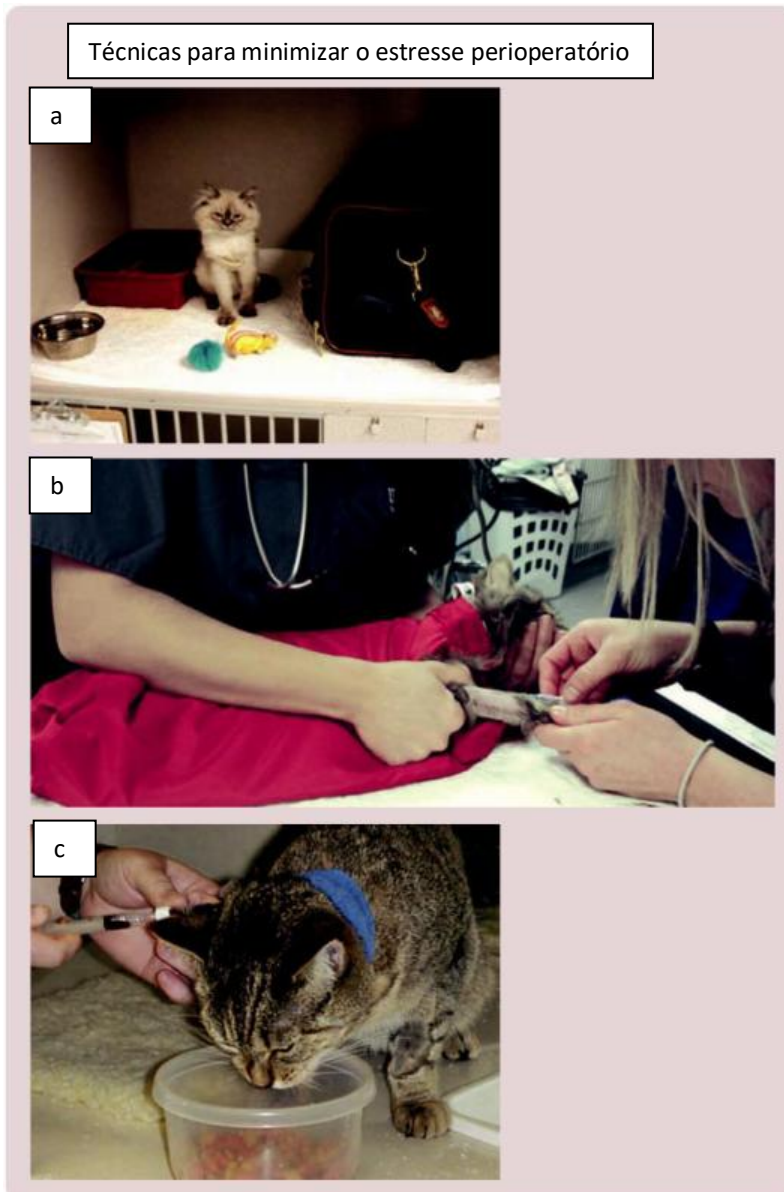

Figura 5 (a) Objetos familiares criam um ambiente pré-cirúrgico menos ameaçador. (b) Uma bolsa para gatos fornece calor e contenção suave. (c) A colocação de um cateter intravenoso fornece acesso venoso para vários procedimentos de injeção ou coleta repetida de sangue, minimizando o desconforto em pacientes felinos.

*Imagens cortesia de Sheilah Robertson.*

## Recomendações para reduzir o estresse durante a hospitalização

### Ambiente

- ❖ Mantenha internações separadas para gatos e cães, se possível.
- ❖ Mantenha os pacientes fora do campo de visão um do outro.
- ❖ Mantenha baixos níveis de luz para acalmar os gatos ansiosos e incentivá-los a descansar.
- ❖ Ao invés de uma conformação de gaiolas hospitalares de tamanho único, crie um ambiente projetado para as necessidades e preferências de cada gato.
- ❖ Use gaiolas hospitalares grandes o suficiente para fornecer um local para o gato se esconder e manter a caixa de areia separada da comida, da cama e da água.<sup>18</sup>
- ❖ O tamanho e a altura da caixa de areia devem corresponder ao tamanho e à mobilidade do gato (Figura 6). Use o granulado higiênico preferido pelo gato, quando possível.
- ❖ Forneça cobertores, brinquedos, comida e granulado higiênico familiares de casa; troque os cobertores apenas quando estiverem sujos.
- ❖ Ajuste o microclima de cada gaiola hospitalar com base nas necessidades individuais; pacientes doentes, geriátricos, sedados e pediátricos requerem uma temperatura ambiente mais quente.
- ❖ Para manter o calor corporal do gato, forneça cobertores confortáveis, toalhas grossas, camas ortopédicas ou tapetes de borracha.
- ❖ Forneça um esconderijo dentro da gaiola hospitalar como uma caixa de papelão, cama do tipo toca ou caixa de transporte (Figura 7).

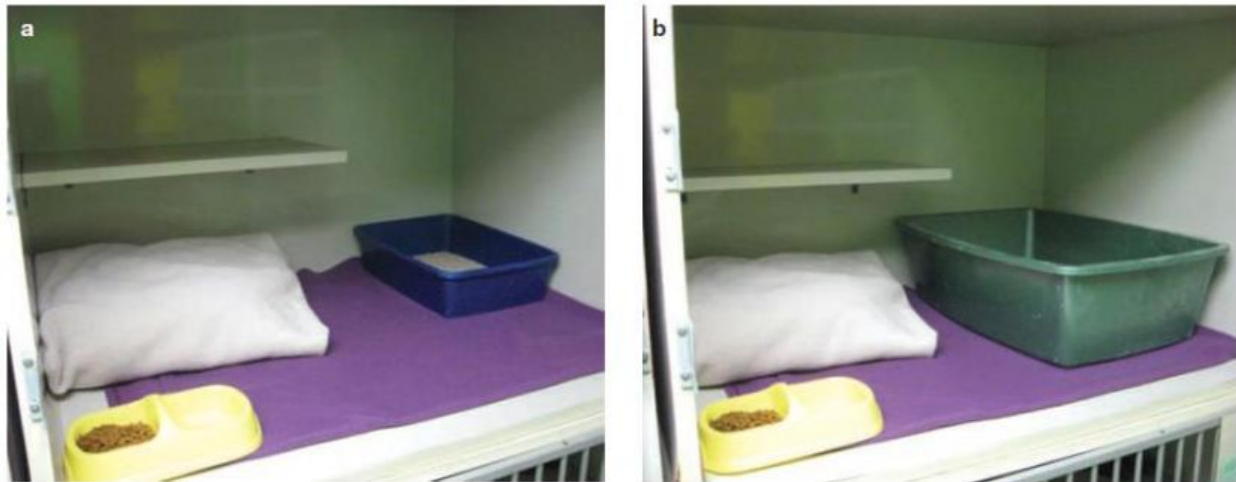

Figura 6 Um gato hospitalizado pode acessar facilmente uma caixa de areia com bordas baixas (a), enquanto uma caixa de areia de bordas altas (b) seria muito mais difícil de acessar. *Imagens cortesia de Susan Little*

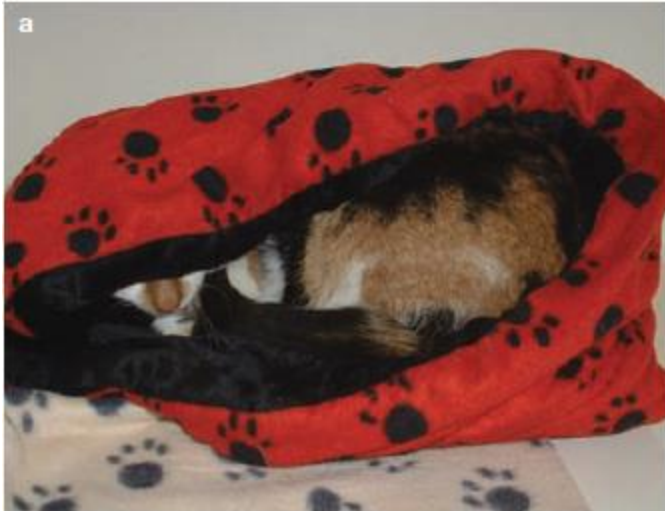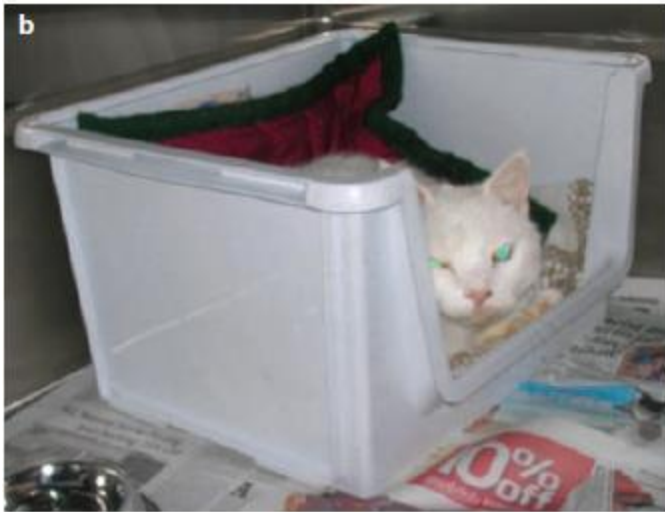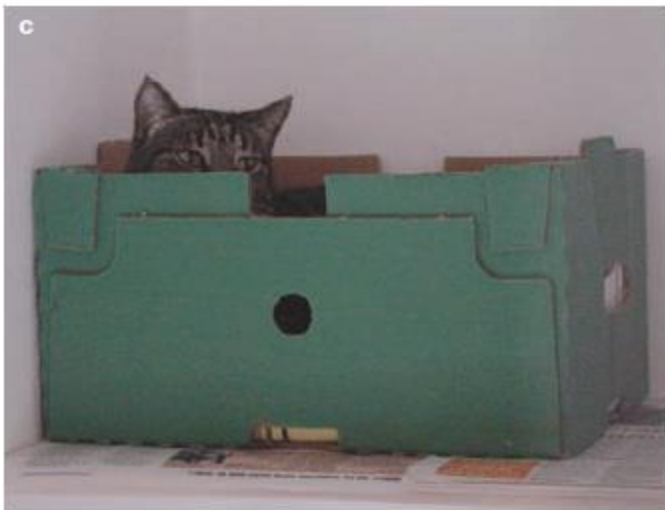

Figura 7 Três exemplos de esconderijos dentro da gaiola hospitalar que fornecem segurança para o gato hospitalizado. *Imagens cortesia de FAB / ISFM*

Ao invés de uma conformação de gaiolas hospitalares de tamanho único, crie um ambiente projetado para as necessidades e preferências de cada gato.

#### **Métodos de redução de estresse adequados para todas as áreas da clínica**

- ❖ Minimize a exposição do gato aos ruídos
- ❖ Minimize a exposição do gato ao tráfego humano
- ❖ Separe gatos de cães e outras espécies animais
- ❖ Mantenha as caixas de transporte elevadas do chão
- ❖ Permita que o gato se esconda quando possível
- ❖ Use feromônios sintéticos calmantes

#### **Equipamentos e acessórios adequados para os gatos**

Os seguintes equipamentos e acessórios ajudarão a reduzir o estresse da hospitalização no paciente felino:

- ❖ Balança de fácil utilização com bordas elevadas (Figura 8a).
- ❖ Máquinas de tosa pequenas e silenciosas.
- ❖ Tubos de coleta de sangue de pequeno volume (Figura 8b).
- ❖ Toalhas de banho grandes e grossas ou cobertores para contenção ou uso em gaiolas hospitalares (Figura 9).

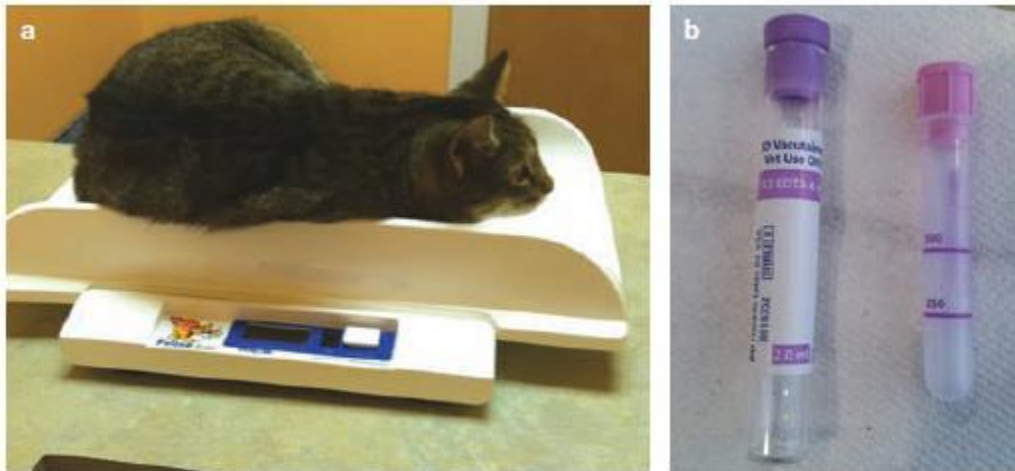

Figura 8 Exemplos de equipamentos adequados para gatos. (a) Balança com bordas elevadas. (b) Tubos pequenos para coleta de sangue. *Imagens cortesia de Dawn Brownlee-Tomasso*



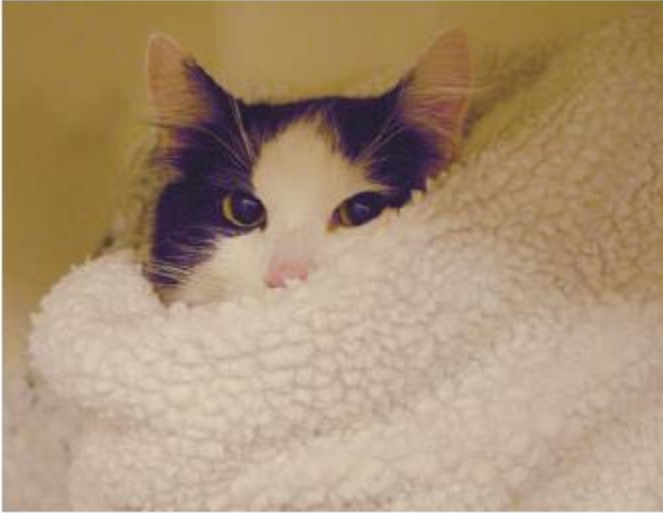

Figura 9 Uma toalha grossa ou cobertor fornece calor e segurança para o gato hospitalizado. *Cortesia de FAB / ISFM*

- ❖ Tapetes de borracha ou almofadas antiderrapantes para forrar os fundos das gaiolas hospitalares ou mesas de exame para fornecer superfícies aquecidas e antiderrapantes.
- ❖ Luvas de proteção projetadas para manuseio de animais, de preferência com punhos longos para proteger as mãos e os braços da pessoa.
- ❖ Máscaras de gato para minimizar os estímulos visuais e acalmar alguns gatos.
- ❖ Sacolas de gato para uma contenção suave.

### **Alimentação**

- ❖ Alimente o gato com sua dieta regular durante a hospitalização. Peça ao tutor para trazer os alimentos favoritos, se apropriado.
- ❖ Inicie as dietas terapêuticas apenas quando o gato voltar para casa e seu apetite normal estiver reestabelecido.
- ❖ Comedores planos, como pequenos pratos de papel e tigelas de água rasa melhoram a ingestão, tornando a comida e a água mais acessíveis.
- ❖ Aqueça os alimentos úmidos em banho-maria até a temperatura corporal do gato. A adição de caldo de galinha ou caldo de atum pode melhorar a palatabilidade.
- ❖ Não deixe alimentos na gaiola hospitalar para gatos que apresentem aversão alimentar (babando, lambendo os lábios, ignorando a tigela, vomitando).
- ❖ Os alimentos devem ser sempre frescos, fornecidos em pequenas porções e reabastecidos conforme necessário.
- ❖ Os estimulantes do apetite podem ser úteis em casos específicos e por breves períodos (2 dias) em conjunto com os métodos descritos acima.<sup>19</sup>
- ❖ As Figuras 10 e 11 ilustram outras técnicas de alimentação para gatos hospitalizados.

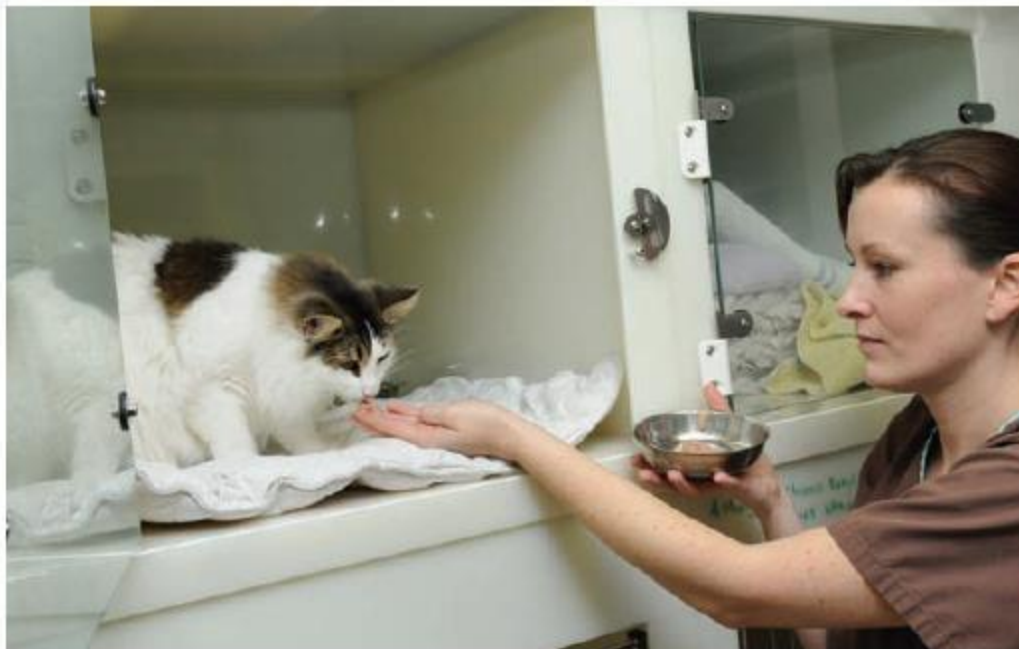

Figura 10 A alimentação com pequenas quantidades de alimentos oferecidas na mão, o uso a curto prazo de estimulantes do apetite e carinho podem incentivar os gatos convalescentes a retomarem a alimentação. *Cortesia de FAB / ISFM*

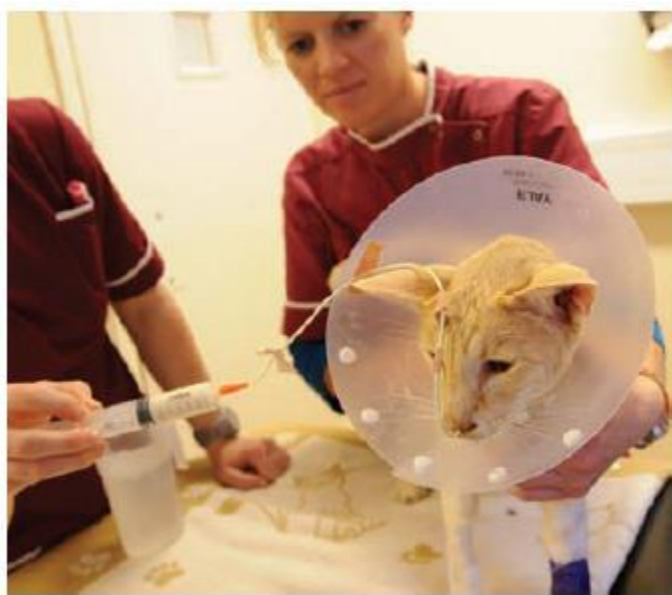

Figura 11 Muitos gatos se beneficiam de um tubo de alimentação quando outras estratégias para incentivar a alimentação falham.<sup>19</sup> Observe que um colar elizabetano macio é preferível, quando disponível. *Cortesia de FAB / ISFM*

### **Dicas gerais**

- ❖ As figuras 12 a 14 ilustram algumas dicas gerais que vão auxiliar a minimizar o estresse e acelerar a recuperação de gatos durante a hospitalização.

### **Dicas gerais para minimizar o estresse durante a hospitalização**

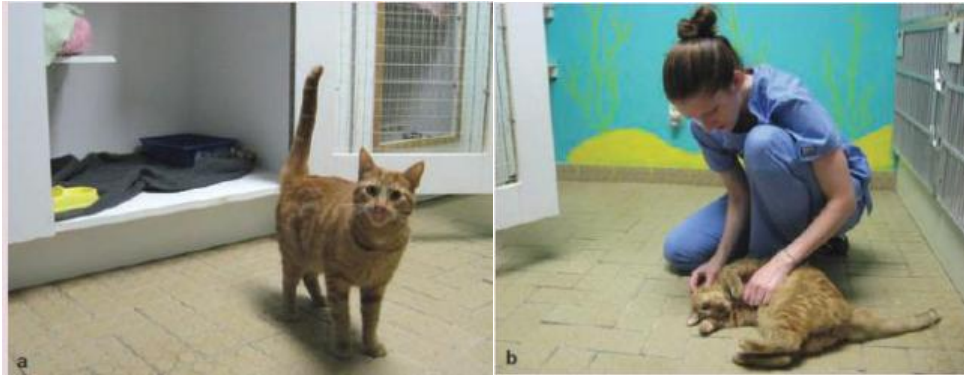

Figura 12 (a) Breves períodos de exercício fora da gaiola hospitalar em uma sala silenciosa com uma caixa de areia e alimentos podem melhorar o apetite e a eliminação em gatos hospitalizados. Os gatos devem ser mantidos fora da linha de visão direta um do outro; nesse caso, não havia outros gatos na enfermaria. (b) Um técnico ou enfermeiro pode incentivar atividades fora da gaiola hospitalar durante a hospitalização e garantir sua segurança. *Imagens cortesia de Susan Little*

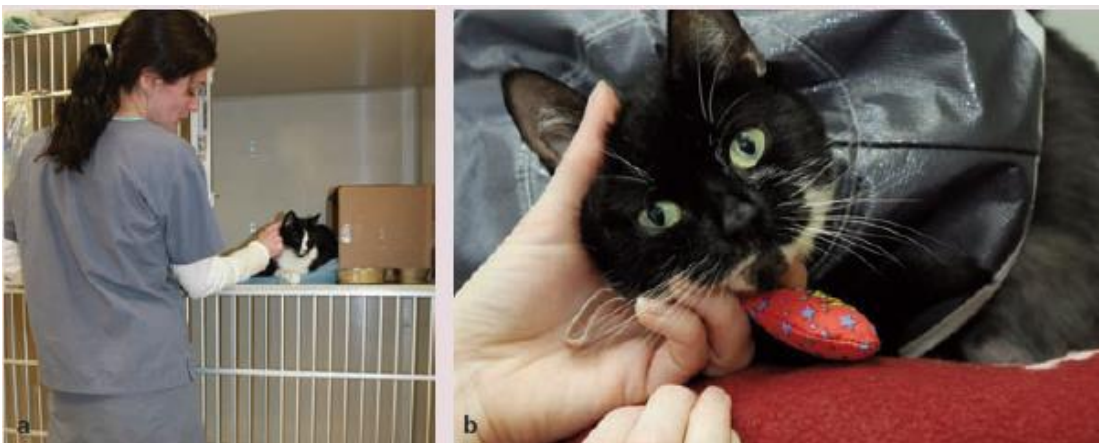

Figura 13 Para gatos receptivos, a interação não médica, como escovação, acariciar, alimentar nas mãos ou brincar pode melhorar o bem-estar físico e mental e acelerar a recuperação. *Cortesia de (a) Heather O'Steen e (b) FAB / ISFM*

## Exemplos de bons cuidados de enfermagem em um ambiente hospitalar

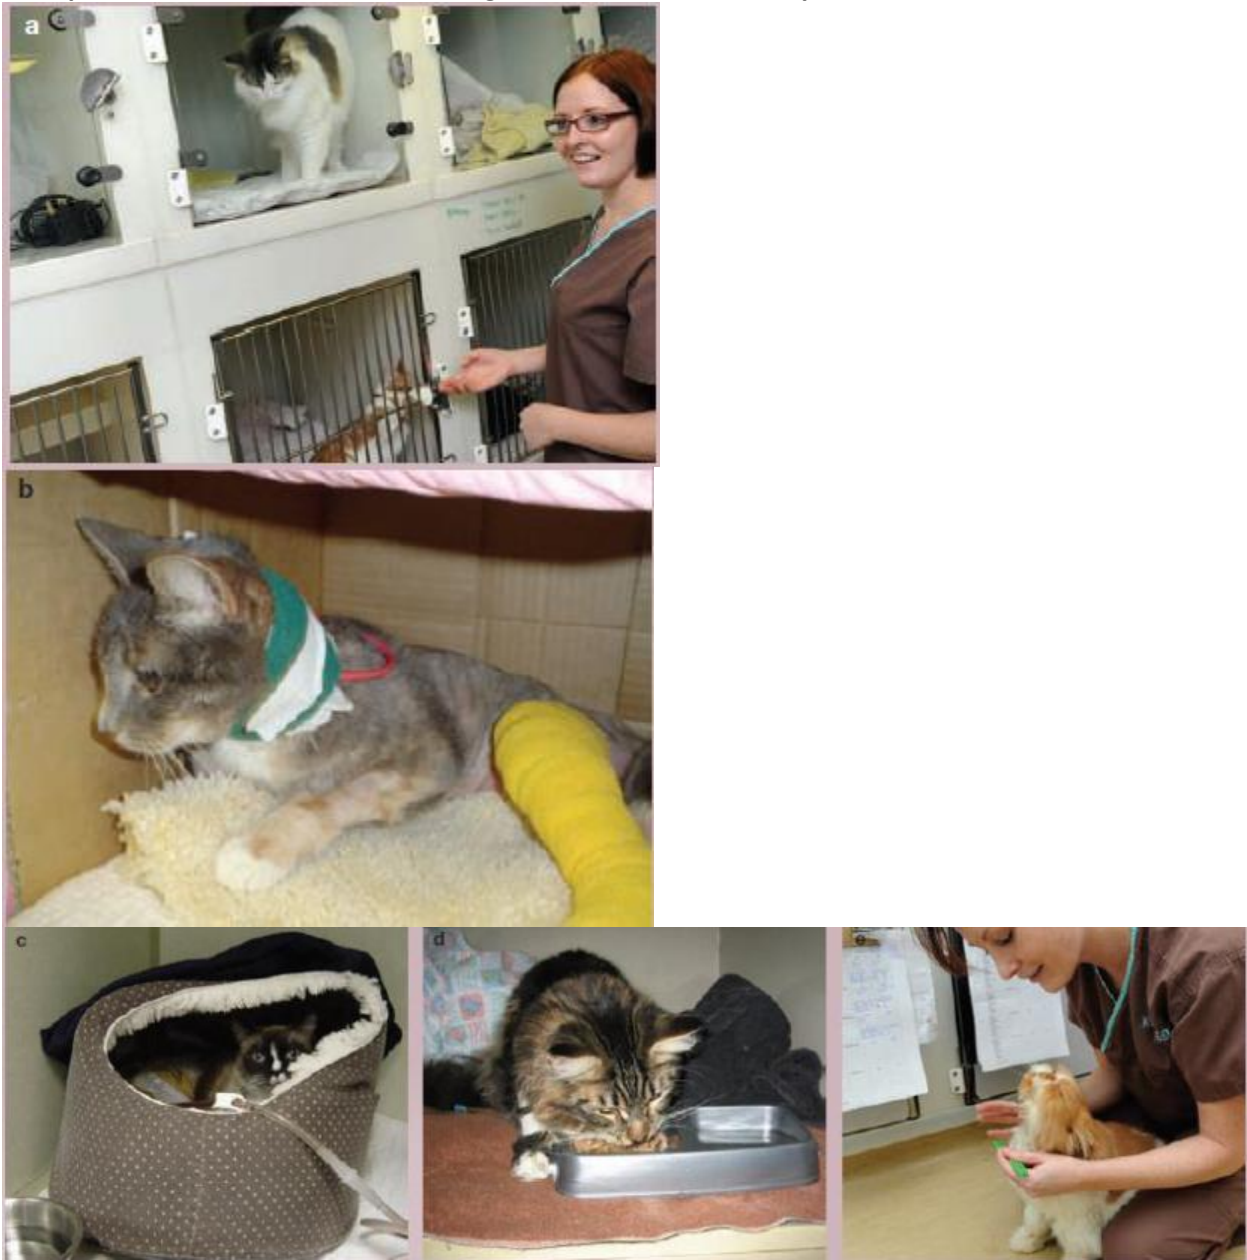

Figura 14 (a) Gaiolas hospitalares individuais contribuem para um ambiente hospitalar de baixo estresse, impedindo a visão direta entre os pacientes. *Cortesia de FAB/ISFM.* (b) Um gato convalescente com cobertores macios e uma caixa de papelão para se esconder; uma bandagem macia no pescoço protege confortavelmente o cateter jugular. *Cortesia de FAB/ISFM.* (c) Uma cama de gato fornece calor e segurança. *Cortesia de Sheilah Robertson.* (d) Fornecer comida ao paciente pós-cirúrgico ajuda a restabelecer uma rotina familiar. *Cortesia de Susan Little.* (e) A interação positiva da equipe com os gatos receptivos contribui para a sensação de segurança do paciente. *Cortesia de FAB/ISFM.*

## **Dicas práticas de cuidados de enfermagem para a equipe veterinária e tutor do gato**

### **Comportamento do tutor no consultório**

Os gatos não são os únicos a ficarem ansiosos em uma visita à clínica veterinária. O tutor que acompanha o paciente no consultório também se sente apreensivo. Quando um gato sente a apreensão de seu tutor, a ansiedade do animal geralmente aumenta.

Os seguintes indicadores ajudarão o tutor a ser uma influência tranquilizadora na sala de exames:

- ❖ Evite comportamentos humanos que, embora sejam destinados a confortar o gato, possam aumentar sua ansiedade. Os exemplos incluem segurar o gato, falar ou encarar seu rosto e perturbar ou invadir seu espaço. Sons humanos destinados a acalmar (como 'shhhh') podem imitar outro gato sibilando.
- ❖ Correções físicas, como ficar batendo na cabeça e correções verbais severas, podem assustar o gato e provocar a resposta de lutar ou fugir. Os tutores de gatos e os membros da equipe veterinária devem lembrar que, apesar de serem membros da família, os gatos não são humanos e reagem de maneira diferente à disciplina.
- ❖ O gato vai ditar quando quiser ser manuseado. Na clínica, instrua o tutor a não manusear ou remover o gato da caixa de transporte até que um membro da equipe veterinária solicite.
- ❖ Reforce o comportamento positivo do gato e ignore o comportamento negativo, em vez de tentar corrigi-lo.

### **Dicas de enfermagem em cuidados domiciliares para tutores**

#### ***As responsabilidades da equipe veterinária***

Os resultados de casos bem-sucedidos geralmente dependem da capacidade do tutor do gato de continuar em casa os cuidados de enfermagem iniciados na clínica ou hospital veterinário. A responsabilidade da equipe veterinária é garantir que o tutor mantenha a assistência ideal do paciente em casa. A educação apropriada do tutor, orientação e suporte contínuo da equipe também podem possibilitar a alta precoce do paciente felino, o que pode beneficiar a todos. Ao discutir as opções de tratamento com um tutor, o técnico / enfermeiro pode descrever as formulações de medicamentos disponíveis e perguntar a ele qual opção melhor corresponde à personalidade do gato e às habilidades físicas do tutor. Se um tutor não tiver experiência anterior na administração de medicamentos, o técnico / enfermeiro pode oferecer sugestões, como um líquido aromatizado que pode ser mais fácil de administrar do que um comprimido amargo ou uma cápsula. O técnico / enfermeiro também pode demonstrar várias técnicas de administração para ajudar os tutores a decidir qual opção pode ser melhor em cada caso.

A educação do tutor é especialmente importante pois praticar cuidados de enfermagem em casa não é intuitivo para todos. A equipe veterinária pode facilitar o processo das seguintes maneiras:

- ❖ Reforce as instruções de cuidados de enfermagem para o tutor, fornecendo-as verbalmente e por escrito, além de usar os recursos online e multimídia disponíveis; se apropriado, demonstrar técnicas (por exemplo, administrar medicamentos ou fluidos subcutâneos) pode ser útil. Uma folha de instruções que inclua explicações sobre o tratamento médico do paciente, juntamente com instruções de acompanhamento e dicas para cuidados adequados de enfermagem em casa, ajudará a garantir o comprometimento.
- ❖ Após a alta do gato, comunique-se com o tutor para confirmar se o tratamento está sendo bem-sucedido e resolver problemas inesperados.

### ***O papel do tutor em casa***

As seguintes dicas de cuidados de enfermagem vão ajudar o tutor do gato a se tornar uma extensão da equipe veterinária após o paciente deixar a clínica:

- ❖ Para cuidados domiciliares agudos, identifique um espaço silencioso, familiar e privado, como um pequeno cômodo com boa luz, onde o tutor possa acessar facilmente seu gato. Um pequeno espaço permite monitorar o gato mais de perto e fornece uma sensação de segurança.
- ❖ Estabeleça uma rotina para administrar medicação oral ao gato.
- ❖ A bancada do banheiro forrada com uma toalha macia ou cobertor fornece um local fechado e seguro para a administração de medicamentos a um gato.
- ❖ Dê ao gato um reforço positivo (por exemplo, alimentos, escovação, carinho) por aceitar medicamentos.
- ❖ Não use alimentos como auxílio para administrar medicamentos, exceto quando medicamentos devem ser administrados com alimentos (por exemplo, quelantes de fósforo). Isso pode causar aversão e reduzir a ingestão de alimentos pelo gato.
- ❖ Forçar o gato a aceitar a medicação é estressante para o tutor e para o gato. Não remova o gato à força de um esconderijo nem interrompa a alimentação, auto-higienização ou eliminação para administração de medicamentos.
- ❖ Seja receptivo com as perguntas e incentive os tutores a telefonarem se tiverem alguma dúvida sobre os cuidados de enfermagem em casa, incluindo a administração de medicamentos. Ofereça maneiras alternativas (por exemplo, diferentes formulações de medicamentos) para atingir a meta do tratamento.
- ❖ Explique ao tutor comportamentos saudáveis dos gatos e sinais de bem-estar que indicam recuperação total. Gatos que se sentem bem tendem a dormir mais frequentemente em uma posição curvada. Eles se auto-higienizam, seguem uma rotina normal, interagem com seus tutores, comem e eliminam regularmente.

A capacidade do tutor do gato de fornecer a continuação de cuidados em casa contribuirá substancialmente para um bom resultado do caso.

### **Cuidados de enfermagem domiciliar**

- ❖ Pacientes com resultados bem-sucedidos dependem da capacidade dos tutores de fornecer uma continuação dos cuidados
- ❖ Com a educação adequada do tutor, a orientação e o suporte contínuo podem ser encerrados mais cedo, o que é benéfico para todos
- ❖ Os cuidados adequados de enfermagem não são intuitivos para a maioria dos tutores; portanto, a orientação a ele é muito importante
- ❖ A comunicação proativa de acompanhamento com o tutor confirmará se o tratamento está sendo bem-sucedido ou identificará problemas inesperados
- ❖ Dar instruções de enfermagem verbalmente, por escrito e usar demonstrações e / ou outros recursos multimídia, quando possível

### **Evite coisas que irritam os gatos**

- ❖ Quando o colar elizabetano for necessário, escolha os feitos de material macio ao invés de plástico rígido (Figura 15a, b).
- ❖ Gatos não gostam de bandagens e curativos apertados ou restritivos. Gatos gostam de se esticar e mover-se livremente. Ataduras elásticas, autoadesivas e não restritivas são bem toleradas

(Figura 15c, d). A maioria dos gatos prefere uma atadura tubular ao invés de esparadrapo ou curativos de gaze não expansível.

- ❖ Muitos gatos reagem negativamente ao álcool para limpar a pele ou "molhar" uma área antes da punção venosa, pois não gostam do cheiro ou da sensação repentina de frio à medida que o álcool evapora. Use solução salina estéril ou água morna como alternativa.
- ❖ Os gatos marcam seu território com feromônios faciais e exibem esse comportamento também em gaiolas hospitalares. Eles podem esfregar a face nos cobertores, caixas, paredes e portas da gaiola hospitalar. Evite limpar algumas dessas áreas marcadas na gaiola hospitalar.
- ❖ Os gatos são bem conhecidos pela limpeza e atenção à higiene. Gatos doentes ou debilitados geralmente são menos capazes de ter esses cuidados e precisam de auxílio. Remova qualquer sangue ou solução medicinal da pele e da pelagem do gato para diminuir o esforço que precisará para executar a própria higiene. Remova as substâncias que podem ter um gosto desagradável para o gato quando ele se lambe.

### Duas práticas de enfermagem comuns que podem incomodar os gatos e suas alternativas

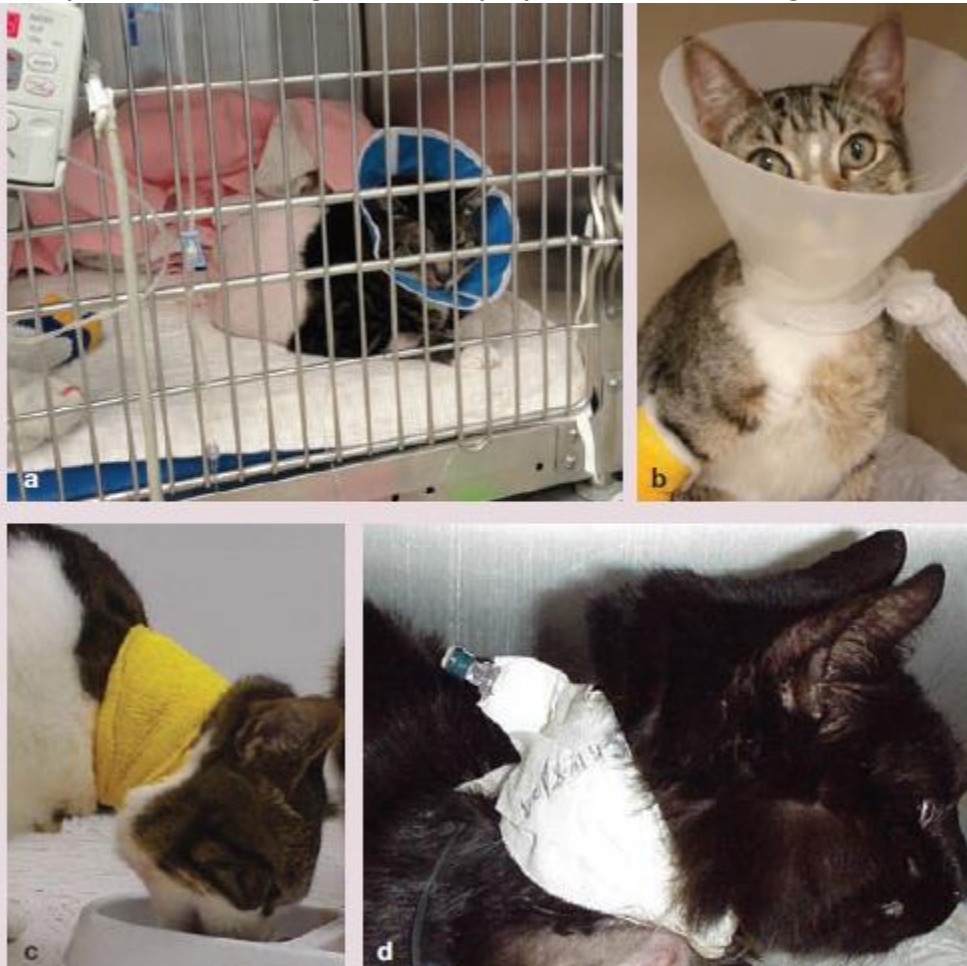

Figura 15 Um colar elizabetano macio (a) é mais confortável que um colar rígido (b). Um curativo autoadesivo flexível (c) é preferível a um curativo rígido e restritivo (d). *Imagens cortesia de Sheilah Robertson*

## Primeiros passos na implementação das Diretrizes

- ❖ **Nomeie um líder na clínica para liderar o esforço de implementar as Diretrizes na rotina.** Selecione uma pessoa treinada que entenda o comportamento felino, necessidades e cursos de doenças e esteja disposto a treinar outros membros da equipe veterinária e educar os tutores sobre os cuidados de enfermagem felinos. Incentive o líder de cuidados de enfermagem a recomendar alterações nas instalações, equipamentos, procedimentos e comportamentos da equipe que irão melhorar os cuidados de enfermagem aos felinos.
- ❖ **Use um plano de ação para implementar as Diretrizes.** Inclua reuniões de equipe de acompanhamento para avaliar o progresso e fazer ajustes no plano original.
- ❖ **Escolha duas ou três iniciativas de cuidados de enfermagem para focar inicialmente.** O progresso em etapas terá mais sucesso do que tentar implementar todas as recomendações das Diretrizes de uma só vez.
- ❖ **Realize reuniões periódicas com a equipe veterinária.** Discuta as melhores abordagens para a implementar as recomendações das Diretrizes, revise o progresso realizado e encontre soluções para os problemas.

### Usando o plano de ação

Simplificando, um plano de ação é uma série de etapas projetadas para atingir seu objetivo - nesse caso, implementar essas Diretrizes na sua clínica veterinária.

Um bom plano de ação é *SMART*: específico, mensurável, atingível, realista e com prazo específico. Desenvolva um plano de ação individual para cada iniciativa que você deseja focar. Um plano de ação deve incluir os seguintes elementos:

- ❖ Um objetivo claro
- ❖ Tarefas específicas para alcançar o objetivo
- ❖ Uma pessoa responsável por cada tarefa
- ❖ Data prevista para conclusão
- ❖ Resultados esperados

### Dicas para montar um plano de ação SMART

- ❖ Envolve todos os membros de sua equipe veterinária na preparação do plano de ação ou, pelo menos, os indivíduos que serão responsáveis pelas tarefas envolvidas
- ❖ Esclareça a meta e o fator relacionado para o seu sucesso e crie uma lista de tarefas prioritárias para atingir a meta
- ❖ Identifique quaisquer barreiras ou restrições que o impeçam de atingir a meta e formas de superá-las
- ❖ Liste todos os recursos que são críticos para alcançar seu objetivo



### Principais pontos:

- ❖ As clínicas veterinárias que se preocupam com seus pacientes felinos o suficiente para utilizar cuidados de enfermagem que atendem às necessidades específicas dos gatos terão inúmeros benefícios:
  - Os membros da equipe veterinária fornecem melhores cuidados que facilitam o tratamento e a recuperação de seus pacientes felinos;
  - Os tutores apreciam e respondem a uma abordagem que enfatiza a segurança e proteção do gato;
  - Os veterinários ganham a lealdade do tutor e terão uma equipe veterinária mais produtiva, mais segura e mais feliz.
- ❖ Essas diretrizes são abrangentes e podem parecer complexas. No entanto, mesmo pequenas melhorias e progresso em etapas nos cuidados de enfermagem dos felinos podem trazer retornos imediatos e começar a construir uma cultura de cuidados felinos qualificados e compassivos.

### Reconhecimentos

A AAFP e a ISFM gostariam de agradecer à Boehringer Ingelheim e Nestlé Purina pelo patrocínio dessas diretrizes e pelo compromisso de ajudar a comunidade veterinária a desenvolver projetos que melhorem a vida dos gatos. Agradecimentos também a todas as práticas fotografadas nestas diretrizes.

### Referências

- 1 Rodan I, Sundahl E, Carney H, Gagnon A-C, Heath S, Landsberg G, et al. **AAFP and ISFM Feline-Friendly Handling Guidelines.** *J Feline Med Surg* 2011; 13: 364–375.
- 2 Carlstead K, Brown JL and Strawn W. **Behavioral and physiological correlates of stress in laboratory cats.** *Appl Anim Behav Sci* 1993; 38: 143–158.
- 3 Stella JL, Lord LK and Buffington CAT. **Sickness behaviors in response to unusual external events in healthy cats and cats with feline interstitial cystitis.** *J Am Vet Med Assoc* 2011; 238: 67–73.
- 4 Greco DS. **The effect of stress on the evaluation of feline patients.** In: August J, ed. *Consultations in feline internal medicine.* Philadelphia: WB Saunders, 1991, p 13.
- 5 Paige CF, Gordon SG, Roland RM and Bogg M. **Prevalence of heart murmurs and occult heart disease in apparently healthy cats.** *J Am Vet Med Assoc* 2009; 234: 1398–1403.
- 6 Quimby JM, Smith ML and Lunn KF. **Evaluation of the effects of hospital visit stress on physiologic parameters in the cat.** *J Feline Med Surg* 2011; 13: 733–737.
- 7 Griffith CA, Steigerwald ES and Buffington CA. **Effects of a synthetic facial pheromone on behavior of cats.** *J Am Vet Med Assoc* 2000; 217: 1154–1156.
- 8 Kronen PW, Ludders JW, Erb HN, Moon PF, Gleed RD and Koski S. **A synthetic fraction of feline facial pheromones calms but does not reduce struggling in cats before venous catheterization.** *Vet Anaesth Analg* 2006; 33: 258–265.
- 9 Brodbelt DC, Pfeiffer DU, Young LE and Wood JLN. **Risk factors for anaesthetic-related death in cats: results from the confidential enquiry into perioperative small animal fatalities (CEPSAF).** *Br J Anaesth* 2007; 99: 617–623.
- 10 Brodbelt D. **Feline anesthetic deaths in veterinary practice.** *Top Companion Anim Med* 2010; 25: 189–194.
- 11 Perrin T. **The Business of Urban Animals Survey: the facts and statistics on companion animals in Canada.** *Can Vet J* 2009; 50: 48–52.
- 12 Volk JO, Felsted KE, Thomas JG and Siren CW. **Executive summary of the Bayer veterinary care usage study.** *J Am Vet Med Assoc* 2011; 238: 1275–1282.

- 13 Westling K, Farra A, Cars B, Ekblom AG, Sandstedt K, Settergren B, et al. **Cat bite wound infections: a prospective clinical and microbiological study at three emergency wards in Stockholm, Sweden.** *J Infect* 2006; 53: 403–407.
- 14 Palacio J, León-Artozqui M, Pastor-Villalba E, Carrera-Martín F and García-Belenguer S. **Incidence of and risk factors for cat bites: a first step in prevention and treatment of feline aggression.** *J Feline Med Surg* 2007; 9: 188–195.
- 15 Natoli E, Baggio B and Pontier D. **Male and female agonistic and affiliative relationships in a social group of farm cats (*Felis catus L.*).** *Behav Processes* 2001; 53: 137–143.
- 16 AAHA/AAFP Pain Management Guidelines Task Force Members, Hellyer P, Rodan I, Brunt J, Downing R, Hagedorn JE and Robertson SA. **AAHA/AAFP pain management guidelines for dogs and cats.** *J Feline Med Surg* 2007; 9: 466–480.
- 17 Wagner KA, Gibbon KJ, Strom TL, Kurian JR and Trepanier LA. **Adverse effects of EMLA (lidocaine/prilocaine) cream and efficacy for the placement of jugular catheters in hospitalized cats.** *J Feline Med Surg* 2006; 8: 141–144.
- 18 Kry K and Casey R. **The effect of hiding enrichment on stress levels and behaviour of domestic cats (*Felis sylvestris catus*) in a shelter setting and the implications for adoption potential.** *Animal Welfare* 2007; 16: 375–383.
- 19 Chan DL. **The inappetent hospitalised cat: clinical approach to maximizing nutritional support.** *J Feline Med Surg* 2009; 11: 925–933.

Versão original disponível online em [guidelines.jfms.com](http://guidelines.jfms.com), [www.icatcare.org/veterinary](http://www.icatcare.org/veterinary) and [www.catvets.com](http://www.catvets.com)

DISCLAIMER: - This publication is intended as a full and faithful translation of the original English language version. The authors, editors, Societies and Publisher will not accept any legal responsibility for any errors or omissions that may be made in this translation. The Societies and Publisher make no warranty, express or implied, with respect to the material contained herein and accept no liability for any errors made during translation of the article.

AVISO LEGAL: - Esta publicação pretende ser uma tradução completa e fiel da versão original em inglês. Os autores, editores, Sociedades e Editora não aceitarão qualquer responsabilidade legal por quaisquer erros ou omissões que possam ser feitos nesta tradução. As Sociedades e o Editor não oferecem nenhuma garantia, expressa ou implícita, com relação ao material aqui contido e não se responsabilizam por quaisquer erros cometidos durante a tradução do artigo.

Esta Diretriz foi traduzida pela Royal Canin do Brasil a partir da fonte:

**Nursing care guidelines:** Carney HC, Little S, Brownlee-Tomasso D, et al. AAFC and ISFM Feline-Friendly Nursing Care Guidelines. *Journal of Feline Medicine and Surgery*, Volume 14, Issue 3, pp337–349. DOI: 10.1177/1098612X12445002. © ISFM and AAFC 2012.

<https://journals.sagepub.com/doi/full/10.1177/1098612X12445002>. Reprinted by permission of SAGE Publications, Ltd.

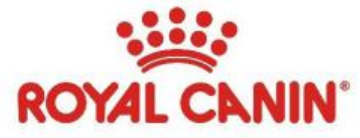

Supplement: sj-pdf-2-jfm-10.1177_1098612X12445002.pdf [file sj-pdf-2-jfm-10.1177_1098612X12445002.pdf]
