# Supplementary material
Source: PubMed Central journal article supplement (PMC11132257)
Supplement: sj-pdf-3-jfm-10.1177_1098612X12445002.pdf [file sj-pdf-3-jfm-10.1177_1098612X12445002.pdf]

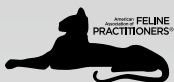

American Association of Feline Practitioners  
www.catvets.com

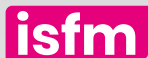

International Society of Feline Medicine  
www.icatcare.org/vets

**ХЕЙЗЕЛ С. ХАРНИ**  
DVM, MS, DABVP  
(Canine and Feline)  
Соавтор руководства

**СЬЮЗЕН ЛИТТЛ**  
DVM, DABVP (Feline)  
Соавтор руководства

**ДОН БРАУНЛИ-ТОМАССО**  
RVT

**АНДРЕА М. ХАРВИ**  
BVSc, DSAM (Feline)  
DEVCI-M-CA, MRCVS

**ЭРИКА МЭТТОК**  
CVT, VTS (ECC)

**ШЕЙЛА РОБЕРТСОН**  
BVMS (Hons),  
PhD, DACVA, DECV, CVA, MRCVS

**РЕНЕ РУСИНСКИ**  
DVM, DABVP (Feline)

**ДОННА СТИВЕНС МЭНЛИ**  
DVM

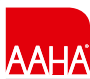

AAFP и ISFM  
приветствуют принятие этих  
рекомендаций Американской  
ассоциацией ветеринарных  
клиник (AAHA)

# РУКОВОДСТВО ПО ВЕТЕРИНАРНОМУ УХОДУ ЗА КОШКАМИ ОТ ЭКСПЕРТОВ AAFP И ISFM\*

Carney H. et al., AAFP and ISFM Feline-Friendly Nursing Care Guidelines, Journal of Feline Medicine and Surgery (2012) 14, 337-349 doi: 10.1177/1098612X12445002, авторское право © ISFM and AAFP 2012. Перепечатано с разрешения SAGE Publications, Ltd

## ВЕТЕРИНАРНЫЙ УХОД

Разные люди трактуют этот термин по-разному. Авторы данного руководства определяют ветеринарный уход как любое взаимодействие между кошкой и командой ветеринарных специалистов (врачи или ассистент, администратор и другой персонал) в клинике или между кошкой и владельцем дома, направленное на сохранение здоровья или восстановление после болезней и ран и затрагивающее физическое и эмоциональное благополучие пациента. Ветеринарный уход также помогает больному или выздоравливающему животному совершать действия, которые оно не может осуществлять без посторонней помощи.

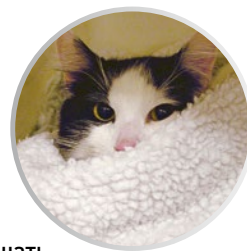

## ОСНОВАНИЕ ДЛЯ СОЗДАНИЯ

Цель данного руководства — помочь всем представителям ветеринарных специальностей понять основные принципы ветеринарного ухода в клинике и в домашних условиях. Они включают способы обеспечения комфортных условий для пациента, от кормления и груминга до поддержания нужного температурного режима. Руководство знакомит с различными приемами, выработанными в ходе многолетней ветеринарной практики коллектива авторов, побуждает специалистов рассматривать ветеринарный уход за кошками под новым углом зрения.

## ОБЩАЯ ЦЕЛЬ

Основополагающая задача ветеринарного ухода за кошками — позволить животным чувствовать себя в безопасности во время медицинских процедур.

### Основные цели ветеринарного ухода за кошками

- Позволить кошке чувствовать себя в безопасности в условиях клиники и дома после выписки
- Минимизировать стресс, который пациент испытывает во время лечения в клинике и дома
- Успешное восстановление после травм, а также болезней, хирургических вмешательств и других видов лечения

## ИСКУССТВО ВЕТЕРИНАРНОГО УХОДА

Ветеринарная медицина — это сплав науки и искусства. Она опирается на результаты и данные исследований в лабораториях, а искусство врачевания заключается в наблюдении, взаимодействии с животным и владельцем и способности понимать и истолковывать состояние пациента. В центре внимания специалистов — поведенческие реакции животного на лечение. Искусство врачевания необходимо для обеспечения наилучшей поддержки здоровым, больным, раненым и выздоравливающим кошкам, оно играет такую же важную роль, как и научные достижения.

Большинство владельцев кошек в состоянии быстро определить, какие специалисты соперничают их питомцам, умеют установить контакт. Представители работников ветеринарной медицины, которые в работе сочетают искусство и науку, не только обеспечивают животным оптимальный уход, но и завоевыва-

ют доверие и признание клиентов. Вовлечение владельцев кошек в процесс лечения — ключевой аспект результативного ветеринарного ухода. Специалисты должны обучать, поддерживать и направлять их.

Опубликованное ранее руководство по правильному обращению с кошками от AAFP и ISFM дает необходимую информацию о значимости уменьшения уровня стресса, который животные испытывают до, во время и после визита к ветеринарному врачу. Данное пособие дополнит эти рекомендации, уделив особое внимание лечению, которое животные получают в клинике и дома. основополагающая цель этого руководства — дать кошкам возможность чувствовать себя в безопасности во время медицинских процедур и манипуляций. Благодаря этому многие проблемы обращения с пациентом во время приема уменьшатся или исчезнут совсем (**Рисунок 1**).

В большинстве своем ветеринарные пособия ориентированы на врачей, тогда как данное руководство

\*AAFP — Американская ассоциация практикующих фелинологов, ISFM — Международное общество ветеринарии кошек.

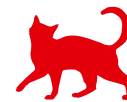

содержит принципы и методы ветеринарного ухода, которые могут быть полезны другим специалистам, например ассистентам ветеринарного врача. Немало ветеринарных специалистов испытывают трудности в работе с кошками и не считают их любимыми пациентами. Одна из важных целей данного руководства — дать полезные рекомендации специалистам, для которых лечение кошек — это испытание. Многие практикующие врачи сочтут, что руководство затрагивает давно знакомые темы. Однако авторы надеются, что смогут дать информацию, которая будет полезной даже для опытных специалистов.

Улучшение состояния животного в клинике — только часть успешного процесса лечения. Немаловажную роль играет способность владельца продолжить правильно заботиться о питомце в домашних условиях. Поэтому руководство обращает внимание на то, как вовлечь клиента в процесс лечения как в клинике, так и дома после выписки. Даже самая компетентная ветеринарная помощь окажется бесполезной, если врач не сможет передать владельцу кошки все необходимые знания и поддерживать с ним связь после прохождения медицинских процедур.

## КАК ПОМОЧЬ КОШКЕ ПОЧУВСТВОВАТЬ СЕБЯ В БЕЗОПАСНОСТИ

### Стресс и страх с точки зрения животного Прогнозирование стрессовых ситуаций

Кошки очень чувствительны к изменениям в окружающей обстановке, у них сильно развита реакция «бей или беги». Эти защитные механизмы прекрасно подходят для выживания, но могут быть опасны в условиях клиники или дома, а также если они наблюдаются в течение длительного времени. Непривычные условия (см. таблицу ниже), с которыми животные сталкиваются в клинике, могут спровоцировать такие реакции, как тревожность и страх. Они подавляют нормальные сце-

### Источники стресса для кошек в ветеринарных клиниках

- Клетка, где нет места для укрытия
- Шум (медицинское оборудование, телефонные звонки, лай, незнакомый персонал клиники, разговоры)
- Запахи (другие животные, дезинфицирующие средства)
- Непривычная пища и режим кормления
- Сенсорная перегрузка из-за активного ритма жизни клиники

нарии поведения (такие как отдых и питание) и повышают бдительность, усиливают потребность спрятаться, а также вызывают различные расстройства — анорексию, рвоту, диарею и даже нарушения работы мочевыделительной и пищеварительной систем<sup>2,3</sup>. Нежелательными физиологическими реакциями на стресс являются гипергликемия, снижение концентрации калия и повышение уровня креатининфосфокиназы в крови, лимфоцитопения, нейтрофилия, непредсказуемые реакции на успокоительные и анестетики, подавление иммунитета и шум в сердце<sup>44</sup>. Эти изменения затрудняют процесс обследования и лечения, могут продлить срок пребывания в стационаре.

Хотя ветеринарные специалисты не могут оградить кошку от всех источников стресса, они в состоянии определить некоторые факторы и уменьшить их воздействие. Больше информации о влиянии окружающей обстановки на госпитализированных животных можно найти в руководстве по правильному обращению с кошками<sup>1</sup>.

### Распознавание страха и тревожности

Страх и тревожность у кошек выражаются в изменении положения ушей, выражения глаз и морды, позы и движениях хвоста, выделениях на подушечках лап.

Рисунок 1.

## СТРАХ И СТРЕСС С ТОЧКИ ЗРЕНИЯ КОШКИ

По дороге в клинику и во время приема кошка чувствует себя, словно она попала в логово хищников (приемная, кабинет врача, манипуляции, хирургические операции, стационар).

### НЕТ ЧУВСТВА БЕЗОПАСНОСТИ И БЛАГОПОЛУЧИЯ

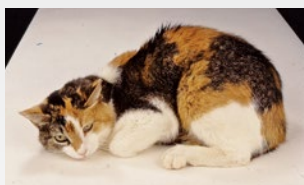

#### ◀ СКОВЫВАЮЩИЙ СТРАХ

- Не двигается
  - Не ест
  - Не пьет
- Кажется, что животному ничего не нужно, но это не так.

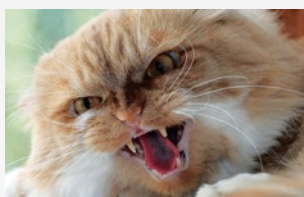

#### ◀ АГРЕССИВНАЯ «ПЛОХАЯ КОШКА»

- Вокализация
  - Кусается/царапается
- Положение кажется кошке безвыходным.

### ПРИ ПРАВИЛЬНОМ УХОДЕ И ОБРАЩЕНИИ

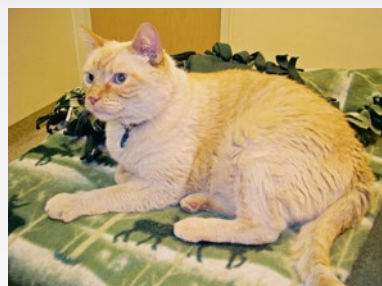

#### ▲ ДОВОЛЬНЫЙ ПАЦИЕНТ

**ЦЕЛЬ:** ДАТЬ КОШКАМ-ПАЦИЕНТАМ ВОЗМОЖНОСТЬ ЧУВСТВОВАТЬ СЕБЯ В БЕЗОПАСНОСТИ

Фото: Hazel Carney, ©iStockphoto.com/Anna Sematkina.

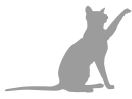

**ОЧЕНЬ ВАЖНО ИЗБЕГАТЬ ЧРЕЗМЕРНОЙ ФИКСАЦИИ.  
ОНА ТОЛЬКО УСИЛИТ ТРЕВОГУ ЖИВОТНОГО И УСЛОЖНИТ  
ПРОЦЕСС РАБОТЫ.**

Испуганные животные могут попытаться убежать. Звуковые сигналы (мяуканье, урчание, шипение, фырканье) говорят о повышении уровня стресса. Некоторые кошки начинают вести себя агрессивно, кусаться, царапаться и нападать. Другие от страха «замирают» — сидят неподвижно с широко открытыми глазами или начинают интенсивно вылизываться. Порой бывает очень трудно отличить признаки боли от проявлений страха и тревоги. Руководство по правильному обращению с кошками содержит больше сведений о распознавании этих эмоций у животных<sup>1</sup>.

### **Способы обращения с испуганными кошками и кошками в состоянии тревоги**

Очень важно избегать чрезмерной фиксации. Она только увеличит тревогу животного и усложнит процесс работы. Врач, ассистенты и владелец кошки должны быть терпеливыми и сохранять спокойствие. Всем специалистам следует быть готовыми приспособиться к индивидуальным потребностям пациента, демонстрировать гибкий подход. Если животное сопротивляется, им нужно поискать другие способы, включая использование успокоительных или приостановку всех видов деятельности на некоторое время, чтобы кошка могла прийти в себя. Если по поведению животного видно, что оно испытывает боль, используйте обезболивающие и снова оцените его реакцию.

### **Преимущества уменьшения стресса у кошек в условиях клиники**

#### **Улучшение состояния пациента**

Позитивная реакция на использование синтетических кошачьих феромонов лицевых желез — при-

### **Использование феромонов лицевых желез эффективно на всех стадиях визита в клинику**

Согласно исследованиям, проведенным на факультете ветеринарной медицины Университета штата Огайо, кошки, которые подвергались воздействию синтетических феромонов, чаще умывались и вылизывались, охотнее гуляли и интересовались едой, чем животные, которые получали плацебо. Аппетит кошек заметно возрастал в течение суток, если у них был доступ к маленькой переноске, где можно спрятаться, а в окружающей среде присутствовали феромоны. Использование этих веществ при подготовке к наркозу делало животных спокойнее во время постановки катетера по сравнению с реакцией контрольной группы. Это доказывает, что использование синтетических кошачьих феромонов и предоставление отдельного места отдыха благотворно влияет на кошек в клинике. Для обработки клеток, столов и простыней лучше использовать феромоны в виде спрея. Для мест размещения животных лучше подойдет диффузор.

мер того, как правильный ветеринарный уход может улучшить состояние пациента во время стационарного лечения. Госпитализированные кошки, в чьих клетках находились полотенца, смоченные синтетическими феромонами, лучше ели и заметно чаще ухаживали за собой<sup>7</sup>. Использование этих веществ при подготовке к наркозу также делало животных спокойнее во время постановки катетера в вену<sup>8</sup>.

Трудности при анестезии у кошек встречаются чаще, чем у собак, и связаны с состоянием здоровья, возрастом, весом, типом и срочностью процедуры<sup>9,10</sup>. Внимательное отношение к поведению пациента и соответствующее обращение перед анестезией помогут уменьшить послеоперационные последствия. В противном случае страх и тревога животного затруднят или даже сведут на нет дооперационное обследование. Уменьшение или исключение стресса у госпитализированных кошек упрощает предоперационный осмотр и забор лабораторных проб, тем самым влияя на безопасность пациента.

### **Довольные владельцы и рост числа визитов в клинику**

Недавние исследования показали низкую заинтересованность владельцев кошек в США и Канаде в ветеринарном обслуживании питомцев. Хотя владельцы кошек, как правило, имеют более высокий уровень образования, чем владельцы собак, они менее охотно идут со своими питомцами в клинику<sup>11</sup>. Результаты работы фокус-групп говорят о том, что одна из основных причин этого — стресс, который испытывает животное во время визита<sup>12</sup>. Трудности транспортировки кошки в переноске, вокализация, физические признаки напряжения, которые демонстрирует животное в зоне ожидания и во время осмотра, — все это угнетает владельцев. В результате многие из них стараются избежать всего этого и просто не показывают своих кошек специалистам. Создание комфортных условий для клиентов и животных до, во время и после визита, включая госпитализацию, сподвигнет владельцев кошек чаще приходить на прием на ранних стадиях заболевания или для проведения профилактического осмотра.

### **Повышение уровня безопасности и удовлетворенности работой для персонала клиники**

Агрессия — одна из самых распространенных поведенческих проблем у кошек. В клинике ее причиной становятся страх и боль. Результатом нападений на персонал становятся укусы и царапины. Уровень инфицирования таких повреждений при отсутствии обработки достаточно высок — от 30 до 50%<sup>13,14</sup>.

Чаще всего инфекциям подвержены раны на руках. Улучшение условий госпитализации для пациентов, раннее распознавание признаков боли и принятие соответствующих мер уменьшают агрес-

**КАЖДЫЙ ЧЛЕН КОМАНДЫ ИГРАЕТ РОЛЬ В ФОРМИРОВАНИИ У КОШКИ ПРЕДСТАВЛЕНИЯ О КЛИНИКЕ С МОМЕНТА, КОГДА ОНА ПОПАДАЕТ СЮДА, И ДО ТЕХ ПОР, ПОКА НЕ ПОКИНЕТ УЧРЕЖДЕНИЕ. С НЕКОТОРЫМИ СОТРУДНИКАМИ ЖИВОТНОЕ ВСТРЕЧАЕТСЯ И ПОЗЖЕ, ЕСЛИ ВЕТЕРИНАРНЫЙ УХОД ПРОДОЛЖАЕТСЯ НА ДОМУ.**

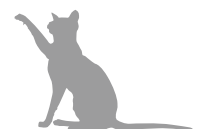



## Схема 1.

# РЕКОМЕНДАЦИИ ПО ВЕТЕРИНАРНОМУ УХОДУ В РАЗЛИЧНЫХ ПОМЕЩЕНИЯХ ВЕТЕРИНАРНОЙ КЛИНИКИ

### I. СМОТРОВАЯ

- В помещении должно быть тепло. Осматривать пациентов нужно на столе с нескользкой теплой поверхностью.
- Развлекайте и поощряйте кошку лакомствами и игрушками.
- Объясните владельцу, как правильно взаимодействовать с питомцем.
- Изучите характер животного и ведите себя в соответствии с его особенностями.
- Убедитесь, что все необходимое оборудование и материалы находятся в кабинете, избегайте неоправданных перемещений между помещениями.
- Используйте успокаивающие синтетические феромоны.

### II. ЗОНА ДИАГНОСТИКИ И ПРОЦЕДУР

- Для процедур выберите самое тихое помещение с минимальным числом раздражителей. Это может быть смотровая комната или специальное процедурное помещение.
- Не давайте животным пересекаться друг с другом в помещениях общего пользования, таких как рентген-кабинет или процедурная.

### III. СТАЦИОНАР

- Клетка должна быть достаточно большой, чтобы в ней можно было спрятаться, а лоток находился на расстоянии от еды, питья и места для сна.
- Подстилка, игрушки, корм и лоток должны быть принесены из дома и убраны из клетки, если они испачкались.
- Использование успокаивающих феромонов улучшит аппетит и частоту самостоятельного груминга.
- В идеале следует расположить собак и кошек в разных помещениях. Они должны находиться в поле зрения друг друга как можно меньше.
- Микроклимат в каждой клетке зависит от потребностей пациента. Больным, пожилым кошкам, котяткам и животным, выходящим из наркоза, комфортно при повышенной температуре воздуха.
- Предусмотрите возможность уменьшения освещенности, чтобы пациенты лучше засыпали. Это также успокаивает тревожных кошек.

сию, вызванную страхом и болевыми ощущениями. Уменьшение стресса и тревожности у госпитализированных кошек имеет и другие преимущества. Комфортные условия содержания животных в стационаре снижают стресс не только у пациентов, но и у персонала клиники.

Если кошки ведут себя спокойнее и быстрее выздоравливают, то ветеринарные специалисты испытывают больше удовлетворения от своей работы. Отсутствие необходимости справляться с беспокойными и неконтактными животными экономит время, повышает эффективность лечения и позволяет принимать больше пациентов.

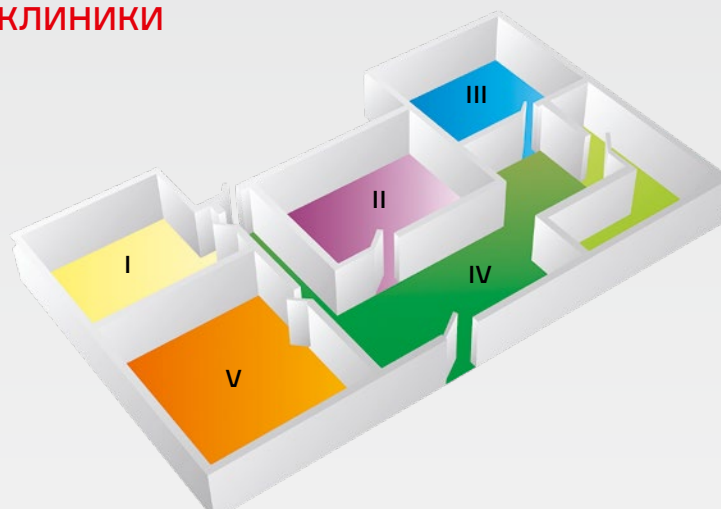

- У восприимчивых кошек должна быть возможность для позитивного взаимодействия (груминга, игры, поглаживания), не связанного с процессом лечения.

### IV. ЗОНА ОЖИДАНИЯ

- Правильно подобранная и привычная для животного переноска уменьшит стресс.
- Переноски нужно ставить на поверхности, которые находятся на относительной высоте, — столы, стулья, полки, подоконники.
- Используйте ширмы и растения, чтобы создать в зоне ожидания отдельные пространства для кошек и собак.
- По возможности кошка должна попадать в смотровую сразу, минуя зону ожидания.
- Используйте успокаивающие синтетические феромоны.

### V. ОПЕРАЦИОННАЯ

- Сделайте все возможное, чтобы минимизировать предоперационный стресс, например, оставьте кошку одну до тех пор, пока не подействует наркоз. Пусть рядом с животным будет какая-то знакомая вещь, создайте успокаивающую обстановку, снизьте уровень шума в хирургическом блоке (разговоры, радио).
- Следите за температурой воздуха в помещении и температурой тела пациента, контролируйте болевые ощущения и восполняйте потери жидкости.
- Пристальное наблюдение за пациентом также обязательно (большинство летальных исходов, вызванных наркозом, случается в период восстановления).

### ВО ВСЕХ ПОМЕЩЕНИЯХ

- Минимизируйте шум.
- Отделите кошек от собак.
- Минимизируйте перемещения.
- Переноски для кошек должны находиться выше уровня пола.
- Позволяйте кошке прятаться, если это возможно.

## ВЕТЕРИНАРНЫЙ УХОД В КЛИНИКЕ С ТОЧКИ ЗРЕНИЯ КОШКИ

Меры, снижающие уровень стресса, можно применять во всех помещениях клиники (см. **Схему 1**).

### Рекомендации для ветеринарных специалистов Работайте в команде

Наблюдайте и должным образом реагируйте на любое проявление стресса у кошки на каждом этапе визита в клинику. Такой подход позволит повысить безопасность и эффективность работы для персонала

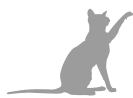

и владельца животного. Каждый член команды играет роль в уменьшении уровня стресса и формирует представление кошки о клинике с момента, когда она попадает сюда, и до тех пор, пока не покинет учреждение. С некоторыми сотрудниками животное встречается и позже, если ветеринарный уход продолжается на дому. Вся команда понимает, что нужно сделать, чтобы визит в клинику прошел гладко и без неприятностей. Эта обширная область ответственности включает в себя также обучение владельцев приемам транспортировки животных, использование комфортных для пациентов техник обследования, расположение сценариев поведения кошек и создание обстановки, которая не вызывает стресс.

Сотрудники клиники должны быть заинтересованы в использовании безопасных и эффективных способов обращения с животными, в обмене знаниями для поддержания высокого уровня оказания услуг и создании культуры непрерывного усовершенствования.

### Оптимизируйте роль ассистентов

Ассистент ветеринарного врача играет важную роль в работе всей команды. Он может повысить эффективность и улучшить результат лечебных мероприятий.

Если он будет использовать весь свой потенциал, то сможет выполнять ряд задач, которыми обычно занимается врач, и распределить некоторые свои обязанности между остальными членами команды. Опытный ассистент понимает основные потребности кошек, умеет распознавать нормальное поведение животных, знаком с особенностями течения заболеваний, симптомами и признаками, на которые владельцы могут не обратить внимания. Умение продуктивно общаться с владельцами — одна из ключевых компетенций ассистента и умение, которое приобретает особую ценность в условиях, когда время врача ограничено. Поддерживая открытый диалог с клиентом, он может предупредить врача о малейшем беспокойстве, связанном со здоровьем кошки.

### Рекомендации по снижению стресса у кошки в приемной клиники

- Проинструктируйте персонал зоны ожидания о том, что владельцам кошек необходимо рассказать об оптимальной конструкции переносок и способах транспортировки (дополнительную информацию можно найти в «Руководстве по правильному обращению с кошками»)<sup>1</sup>.
- В зоне ожидания должны быть поверхности выше уровня пола (столы, стулья, полки, скамьи), на которые клиенты смогут поставить переноски с животными.
- Разделите кошек и собак в зале ожидания и сократите время ожидания, чтобы минимизировать их пересечения.
- На **Рисунке 2** изображена зона ожидания, комфортная для кошек.

### Рекомендации по уменьшению стресса в смотровом кабинете

- Проводите осмотры в тихом теплом помещении на столе с нескользким покрытием.
- Убедитесь, что все необходимое оборудование и материалы находятся здесь, и избегайте неоправданных перемещений между кабинетами, чтобы не прерывать осмотр пациента.
- Изучите темперамент и характер кошки и используйте соответствующий подход.
- Расскажите владельцу животного, как он может взаимодействовать с питомцем во время осмотра (**Рисунок 3**).

### Рекомендации по уменьшению стресса во время физикального обследования

- От подхода, который выбирают специалисты, и их настроения во многом зависит успех взаимодействия с животным. Будьте терпеливы, спокойны, позитивны, внушайте доверие.
- Тщательный длительный осмотр кошек улучшает эффективность лечения. Торопливый врач может вызвать тревогу у пациента и пропустить важные

Рисунок 2

## ОСОБЕННОСТИ ЗОНЫ ОЖИДАНИЯ, КОМФОРТНОЙ ДЛЯ КОШЕК

(a) Администратор находится в зоне доступа клиентов, чтобы ответить на вопросы или оказать помощь.

(b) В зоне ожидания выделено отдельное место для владельцев, которым нужно личное пространство или необходимо изолировать свою кошку от других животных.

(c) Скамья позволяет поставить переноску на возвышение рядом с владельцем.

(d) Если накрыть переноску полотенцем, получится импровизированное укрытие.

Фото FAB/ISFM

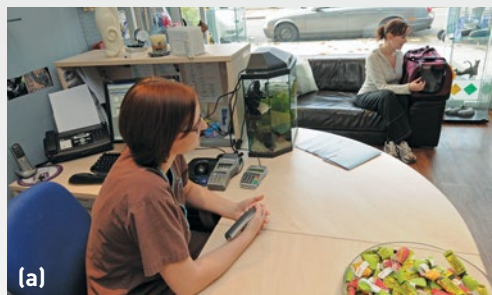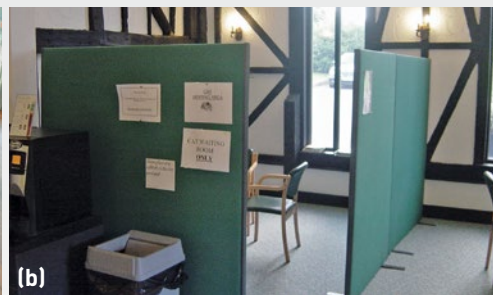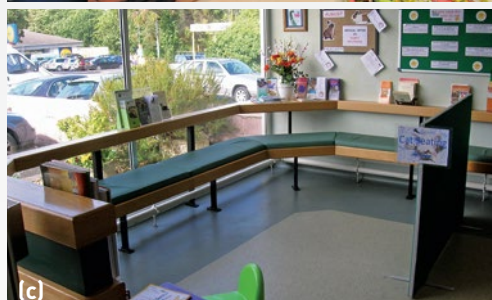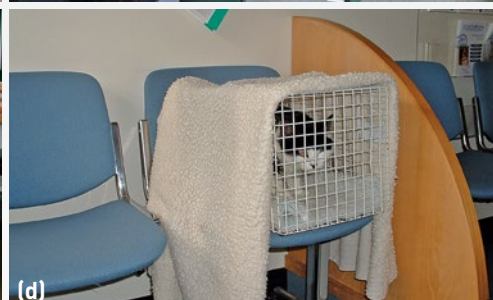

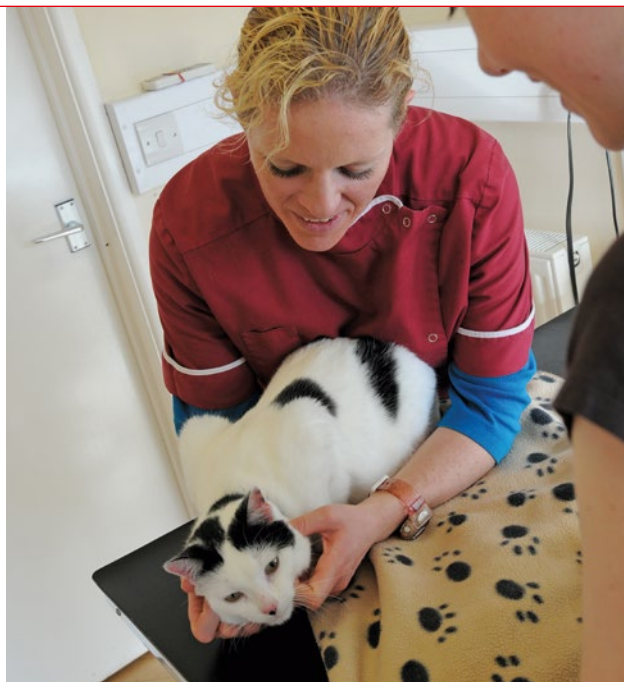

▲ **Рисунок 3.** Присутствие при осмотре владельца кошки может минимизировать тревогу животного, вызванную незнакомой обстановкой или медицинским вмешательством. Фото FAB/ISFM.

симптомы или признаки. Если животное во время обследования остается спокойным и расслабленным, владелец начнет доверять специалисту.

- Отметьте в карточке пациента, какие приемы работы не вызывают стресс, а какие наоборот.
- Откройте переноску, чтобы кошка могла сама выйти из нее. Это даст ей чувство безопасности и контроля над ситуацией. Старайтесь не заставлять животное покидать переноску, если оно не хочет. Попробуйте выманить его лакомствами или игрушками.
- Осматривайте кошку там, где ей нравится, — на столе, на полу, на весах или в переноске.
- Кошка может воспринимать взгляд в упор как угрозу. Медленное моргание выражает доверие и дружелюбие<sup>15</sup>.
- Если животное напряжено или возбуждено, прервите осмотр и позвольте ему успокоиться. В условиях жестких временных рамок этим способом часто пренебрегают.
- Главное, о чем нужно помнить во время осмотра: не стоит усиливать фиксацию в ответ на сопротивление животного. Кошки, которые демонстрируют слабые признаки тревоги, например вертятся и ерзают, лучше реагируют, когда врач продолжает обследование в спокойной манере.
- Всегда старайтесь наградить пациента за хорошее поведение лакомством или лаской.

Это способствует расслаблению кошки. Признаки хорошего поведения могут быть практически незаметными, например изменение выражения морды или расслабление мускулатуры.

### Рекомендации по уменьшению уровня стресса в диагностических и процедурных помещениях

Кошки могут испытывать боль и страдание во время диагностических или экстренных процедур, таких как многократные проколы вен, цистоцентез или установ-

ка катетера большого диаметра<sup>16</sup>. Эффекты от этих вмешательств могут накладываться друг на друга, если одна и та же процедура повторяется несколько раз или медицинские манипуляции следуют одна за другой. Использование анальгетиков, таких как внутримышечный бупренорфин, может значительно упростить задачу. Если аккуратно зафиксировать животное не удалось, оно испытывает боль или необходимые вмешательства будут многократными или болезненными (обработка ран, перевязки), предпочтительно использовать успокоительные препараты или общий наркоз в сочетании с обезболивающими веществами.

### Советы по уменьшению стресса во время диагностики и проведения процедур

- **Помещение.** Для диагностики и процедур выберите тихое спокойное место.
- **Положение пациента.** Поместите кошку на мягкую нескользкую поверхность, выберите наиболее естественное положение тела, подходящее для запланированной процедуры. Например, сделайте пункцию мочевого пузыря в удобной для кошки позе — стоя или положив ее на бок, а не на спину.
- **Кошачьи феромоны лицевых желез.** Обработка синтетическими феромонами столов, подстилок, клеток в процедурных и стационарных помещениях за 10–15 минут до приема дает успокоительный эффект<sup>8</sup>.
- **Прокон вены.** Яремная, головная или медиальная подкожная вены лучше всего подходят для забора крови. Установка катетера в медиальную подкожную вену подходит для кратковременных процедур и взятия крови на анализ. Прокол этой вены требует минимальной фиксации и проводится в удобном для животного положении (**Рисунок 4**). Бритье как правило не требуется, это позволяет ускорить процедуру и избежать действий, который могут встревожить кошку.
- **Установка внутривенного катетера.** Избежать множественных проколов вен для заборов крови, инфузионной терапии и/или внутривенного лечения, а также экстренных процедур можно с помощью внутривенного катетера. Процедуру установки катетера в не экстренных случаях можно облегчить, если использовать анестезирующие кремы. Чаще всего это лидокаин,

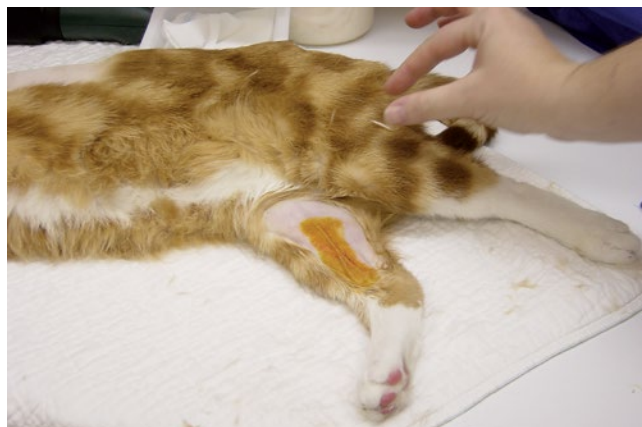

▲ **Рисунок 4.** Установка катетера в медиальную подкожную вену — оптимальный вариант для кратковременных процедур и забора крови. Фото Sheilah Robertson.



инкапсулированный в липосомы, или эвтектическая смесь лидокаина и прилокаина. Оба препарата характеризуются низкой впитываемостью<sup>17</sup>. Зафиксируйте катетеры с помощью небольшого количества специального пластыря. Регулярно проверяйте все повязки и фиксаторы — они не должны быть слишком тугими и уменьшаться в размерах из-за намокания. Осмотрите швы катетера яремной вены и закройте их с помощью эластичной самоклеящейся повязки.

- **Введение подкожных инъекций.** Если подогреть жидкости для подкожных инъекций до температуры тела кошки, можно облегчить процедуру введения препаратов. Для этого обычно используют микроволновую печь или ванночку с теплой водой. Каждый специалист должен продумать и отработать на практике процедуру подогревания жидкости, чтобы достичь комфортной температуры и не обжечь пациента. Для этого нужно взять упаковку с лекарством, которая хранилась в условиях постоянного температурного режима, открыть ее, поставить в контейнер вертикально, чтобы избежать утечек тепла, и поместить в микроволновую печь. Каждые 15 секунд ее нужно вынимать, чтобы взболтать содержимое (из-за неправильной формы упаковки жидкости могут нагреваться неравномерно) и проверить температуру. Когда столбик термометра поднимется до 37,8–38,9 °С, прекратить подогрев и записать параметры мощности и время, которое требуется для достижения такого результата. Оставьте эти сведения в доступном месте — рядом с микроволновой печью или в описании процедур лечения с помощью подкожных препаратов.
- Не позволяйте пациенту видеть других животных. Это касается не только живых существ, но и реалистичных фотографий и моделей (в клинике предпочтительнее использовать иллюстрации).

### Рекомендации по уменьшению предоперационного стресса

- Сделайте все возможное, чтобы минимизировать стресс, который кошка испытывает перед хирургическим вмешательством:
  - держите животное в отдельном тихом помещении до тех пор, пока не подействует наркоз;

- пусть рядом с животным будет знакомый предмет — домашняя подстилка или игрушка (**Рисунок 5a**). Этот прием также работает во время восстановления после операции);
- создайте успокаивающую обстановку, минимизируйте посторонние шумы (разговоры, работа приборов);
- используйте синтетические кошачьи феромоны лицевых желез в клетке и в процедурном помещении.
- Следите за температурой воздуха в помещении и температурой тела пациента, контролируйте болевые ощущения и восполняйте потери жидкости (**Рисунок 5b**).
- Пристально следите за состоянием пациента во время восстановления, большинство смертей, вызванных наркозом, происходят именно в этот период.<sup>10</sup>

### Рекомендации по уменьшению стресса при госпитализации Окружающая обстановка

- По возможности держите кошек и собак в разных помещениях.
- Пациенты не должны попадать в поле зрения друг друга.
- Поддерживайте низкий уровень освещенности, чтобы тревожные кошки могли успокоиться и отдохнуть.
- Избегайте стандартизированного подхода, создайте в клетках обстановку, которая соответствует индивидуальным потребностям и предпочтениям животных.
- Используйте просторные клетки, в которых кошка сможет найти место для укрытия, а лоток будет находиться на расстоянии от пищи, воды и подстилки.<sup>18</sup>
- Размер и высота лотка должны соответствовать размерам кошки и степени ее подвижности (**Рисунок 6**). По возможности используйте лоток, который нравится животному.
- Пусть в клетке будут домашние игрушки, корм, лоток и подстилка. Последнюю нужно заменять, в случае если она испачкается.
- Микроклимат в каждой клетке зависит от потребностей пациента. Больным, пожилым кошкам, котяткам и животным, выходящим из наркоза, необходима повышенная температура воздуха.

Рисунок 5.

## СПОСОБЫ УМЕНЬШЕНИЯ ПРЕДОПЕРАЦИОННОГО СТРЕССА

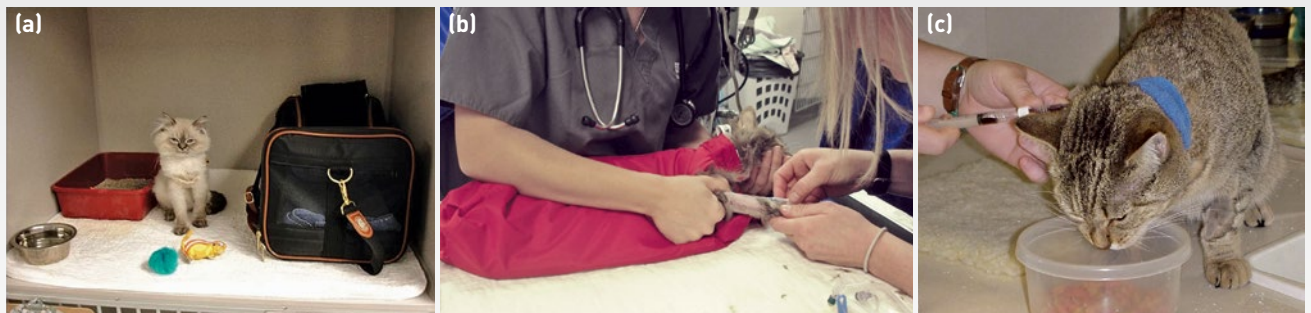

- ▲ (a) Знакомые предметы делают обстановку менее пугающей.
  - (b) Специальная сумка согревает и обеспечивает мягкую фиксацию.
  - (c) Установка внутривенного катетера позволяет производить множественные инъекции и заборы крови, минимизируя неприятные ощущения у пациента.
- Фото Sheilah Robertson.



Рисунок 6.

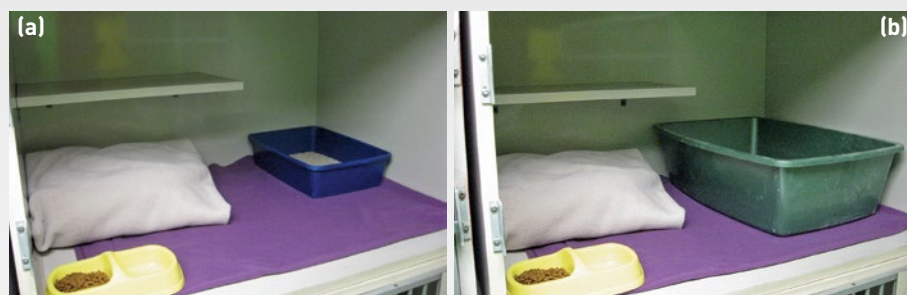

◀ Госпитализированная кошка может легко зайти в лоток с низкими бортиками (a), тогда как модель с высокими бортиками (b) вызовет у нее затруднения. Фото Susan Little.

Рисунок 7.

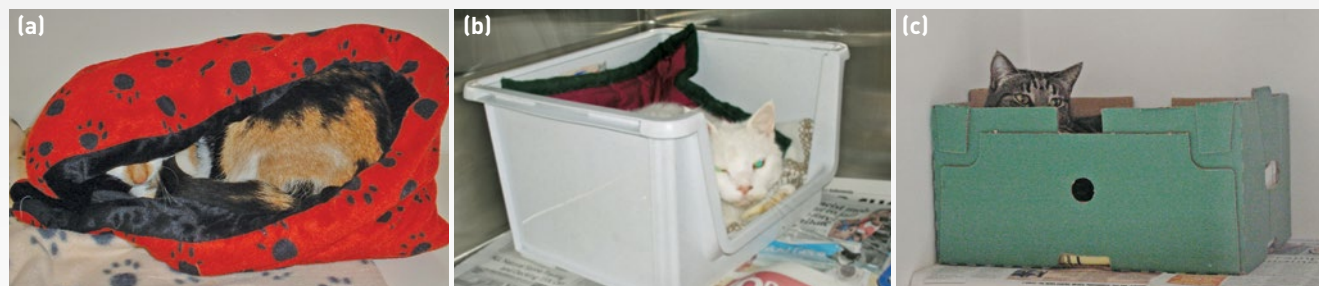

▲ Три примера укрытий внутри клеток, позволяющих кошкам чувствовать себя в безопасности. Фото FAB/ISFM.

- Чтобы кошка не замерзала, нужна удобная подстилка. Ее можно сделать из толстых полотенец, флисовой ткани или ковриков для йоги.
- Оборудуйте укрытие внутри клетки. Это может быть крепкий бумажный пакет, картонная коробочка или переноска для кошки (Рисунок 7).

### Специальное оборудование и аксессуары для работы с кошками

Нижеперечисленное оборудование и аксессуары помогут уменьшить стресс, который испытывают кошки во время стационарного лечения.

- Простые в использовании весы с высокими бортиками (Рисунок 8a)
- Маленькие и бесшумные машинки для бритья
- Маленькие пробирки для забора крови (Рисунок 8b)
- Большие пушистые полотенца или флисовая ткань для фиксации и посадки в клетку (Рисунок 9).

### Кормление

- Для кормления в стационаре используйте привычный для кошки корм. По возможности попросите владельца принести ее любимые лакомства.
- Переводить животное на лечебную диету следует дома после выписки, когда восстановится аппетит.
- Плоская посуда, например бумажные тарелки и неглубокие миски, сделает еду и питье доступнее, а значит, животные будут съедать больше.
- Консервы можно подогреть до температуры тела кошки в микроволновой печи или с помощью горячей воды. Вкусовые качества улучшатся, если добавить куриный бульон или сок тунца.
- Не оставляйте корм в клетках кошек, которые демонстрируют отвращение к еде (слюнотечение, облизывание губ, игнорирование миски с кормом, рвота).
- Корм всегда должен быть свежим. Его нужно давать небольшими порциями, при необходимости добавлять еще.

- В определенных случаях могут быть эффективны стимуляторы аппетита, если использовать их в течение короткого периода времени (до двух дней) в сочетании с другими методами<sup>19</sup>.
- На Рисунок 10 и 11 изображены другие техники кормления, которые используются при стационарном лечении.
- Материал, из которого делают маты для йоги, или нескользкие коврики могут использоваться в качестве теплого напольного покрытия в клетках, а также служить обивкой стола для осмотров.
- Моющиеся прихватки для духовки или защитные перчатки для работы с животными, лучше с длинными манжетами, чтобы уберечь ладони и предплечья.
- Специальные маски минимизируют количество визуальных раздражителей и помогают успокоить животное.
- Сумки для аккуратной фиксации кошек.

### Способы уменьшения стресса, подходящие для всех зон клиники

- Старайтесь не подвергать кошку воздействию шума
- Старайтесь не давать животному возможности видеть перемещения людей
- Оградите кошек от собак и животных других видов
- Переноски для кошек должны находиться выше уровня пола
- По возможности разрешайте животному прятаться
- Используйте успокаивающие синтетические феромоны



Рисунок 8

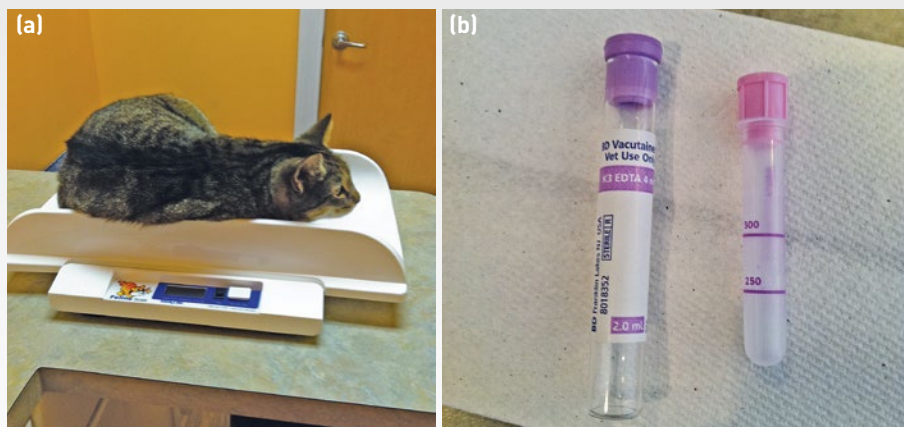

◀ Примеры специального оборудования для работы с кошками.

(a) Весы для кошек с высокими бортиками.

(b) Маленькие пробирки для забора крови.

Фото Dawn Brownlee-Tomasso.

### Общие советы

На **Рисунках 12–14** можно увидеть общие приемы, которые уменьшат стресс и ускорят выздоровление госпитализированных кошек.

### ПРАКТИЧЕСКИЕ СОВЕТЫ ПО ВЕТЕРИНАРНОМУ УХОДУ ДЛЯ СПЕЦИАЛИСТОВ И ВЛАДЕЛЬЦЕВ КОШЕК

#### Поведение владельца животного во время обследования

Не только кошки проявляют тревожность во время визита в клинику. Владелец тоже испытывает некоторые опасения. Животные чувствуют это и начинают беспокоиться еще сильнее.

Некоторые рекомендации владельцам кошек, чтобы успокоить животное во время осмотра:

- Избегайте «человеческих» сценариев поведения, которые вместо того, чтобы успокоить кошку, еще больше расстроят ее. Не нужно крепко сжимать животное в руках, разговаривать, смотреть в глаза и вторгаться в его личное пространство. Звуки, которые люди считают успокаивающими (например, «шшш»), могут напомнить шипение другой кошки.
- Попытки заставить кошку вести себя спокойно посредством физического воздействия (нажатие на голову)

или команд, произнесенных строгим голосом, только напугают животное и могут вызвать реакцию «бей или беги». Владельцы кошек и ветеринарные специалисты должны помнить: несмотря на то, что мы считаем животных членами семьи, их реакции на дисциплинарные меры отличаются от человеческих.

- Кошка даст понять, когда ее можно будет взять на руки. Владельца нужно предупредить, чтобы он не доставал животное из переноски прежде, чем об этом не попросит специалист.
- Поощряйте правильное поведение кошки и игнорируйте нежелательное вместо того, чтобы пытаться его исправить.

#### Ветеринарный уход в домашних условиях: советы для владельцев кошек Задачи ветеринарных специалистов

Выздоровление кошки часто зависит от способности ее владельца обеспечить должный уход в домашних условиях после выписки из клиники. Удостовериться, что он делает все правильно, — одна из задач персонала ветеринарной клиники. Обучение владельца, руководство и поддержка со стороны ветеринарных специалистов способствуют скорейшему выздоровлению кошки, что положительно влияет на всех участников процесса лечения.

При обсуждении процедуры лечения ассистент ветеринарного врача может предложить владельцу

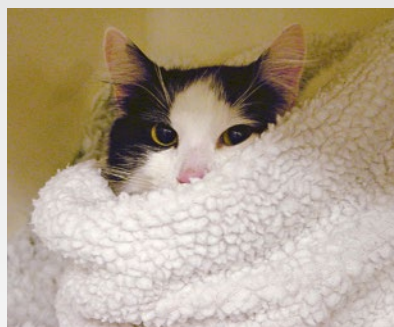

▲ Рисунок 9.

Пушистое полотенце или флисовая ткань дают тепло и чувство безопасности в стационаре.

Фото FAB/ISFM.

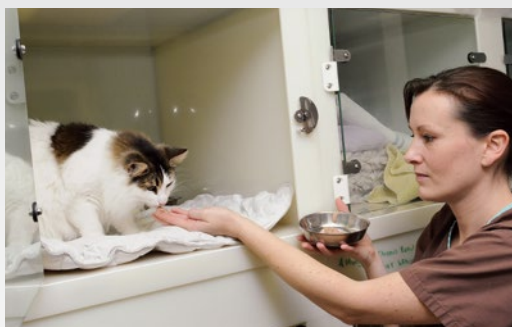

▲ Рисунок 10.

Кормление из рук небольшими порциями, кратковременное использование стимуляторов аппетита и ласка могут побудить выздоравливающую кошку начать есть.

Фото FAB/ISFM.

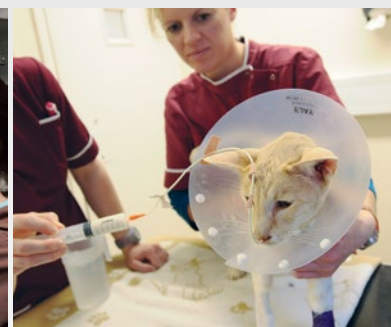

▲ Рисунок 11.

Когда все остальные способы кормления не дают эффекта, кошек начинают кормить с помощью специального зонда. По возможности рекомендуется использовать мягкий ветеринарный воротник.

Фото FAB/ISFM.



## ОБЩИЕ СОВЕТЫ ПО УМЕНЬШЕНИЮ СТРЕССА ПРИ ГОСПИТАЛИЗАЦИИ

Рисунок 12.

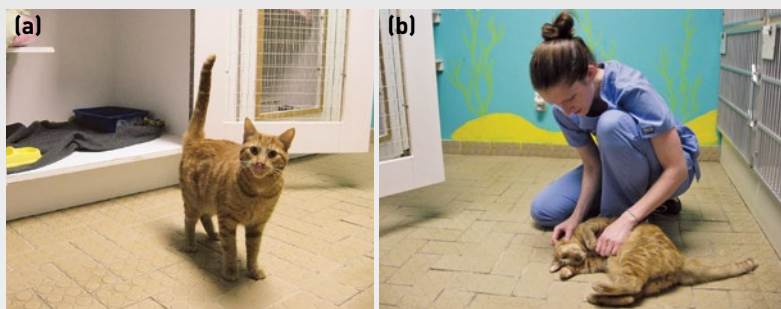

◀ (a) Небольшие периоды физической активности могут улучшить аппетит и пищеварение. Кошку нужно выпускать из клетки в тихом месте, где есть доступ к корму и лотку. Животные не должны попадать в поле зрения друг друга. Это фото было сделано в момент, когда в комнате не было других кошек. (b) Ассистент может находиться рядом с животным, побуждать его к физической активности и давать ощущение безопасности. Фото Susan Little.

Рисунок 13.

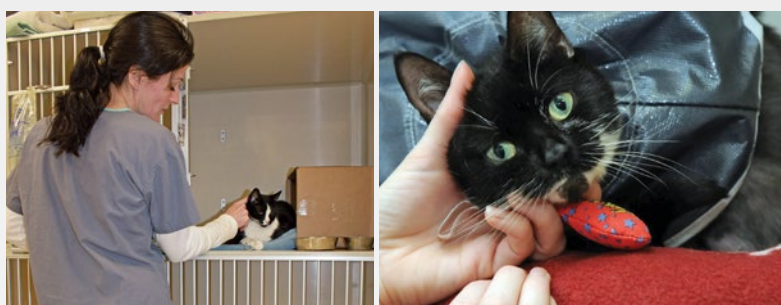

◀ Немедицинские действия, такие как почесывание, поглаживание, игра или кормление с рук, могут улучшить психическое и физическое состояние восприимчивых кошек и ускорить процесс выздоровления. Фото Heather O'Steen (a) и FAB/ISFM (b).

## ПРИМЕРЫ ПРАВИЛЬНОГО ВЕТЕРИНАРНОГО УХОДА В УСЛОВИЯХ СТАЦИОНАРА

Рисунок 14.

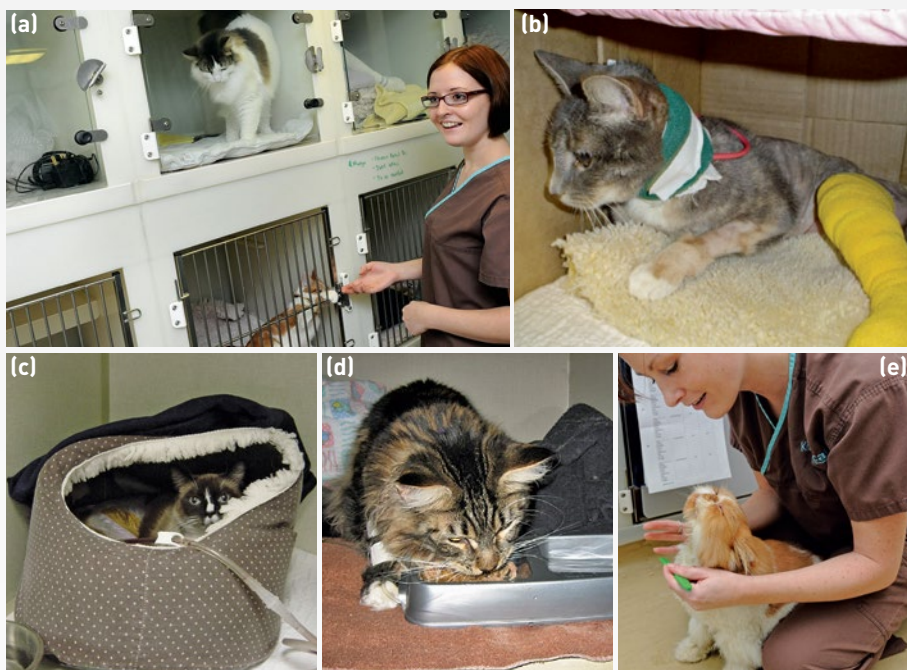

◀ (a) Такое расположение клеток позволяет снизить уровень стресса, ведь животные находятся вне поля зрения друг друга. (b) В клетке этой выздоравливающей кошки есть мягкая подстилка и картонная коробка, где она может спрятаться. Мягкая повязка на шее удобно фиксирует катетер в яремной вене. (c) Лежанка дает тепло и чувство защищенности. (d) Домашний корм помогает животному, перенесшему операцию, вернуться к привычному ритму жизни. (e) Позитивное взаимодействие персонала клиники с восприимчивыми кошками дает животным чувство защищенности. Фото (a, b, e) FAB/ISFM, фото (c) Sheilah Robertson, фото (d) Susan Little.

несколько форм лекарственных препаратов, чтобы выяснить, что будет более удобно для приема животным и использованием владельцем. Если владельцу раньше не приходилось давать кошке лекарства, ассистент может предложить заменить горькие таблетки или капсулы на жидкость с приятным для животного вкусом.

Специалист также может показать несколько способов введения препаратов, чтобы владелец выбрал наилучший вариант.

Обучение владельцев особенно важно, ведь большинство из них незнакомы со способами и приемами

медицинского ухода. Ветеринарные специалисты могут упростить процесс следующими способами:

- Дать очень подробные устные и письменные инструкции с использованием мультимедийных материалов и интернет-ресурсов. При необходимости может быть полезно продемонстрировать нужные техники (введение лекарств, подкожные инъекции). План лечения с подробными комментариями и рекомендациями нужно записать на рецептурном листе.
- Поддерживать контакт с владельцем после выписки, чтобы он мог сообщить о возникших проблемах или прогрессе в лечении.



### Задачи владельца кошки

Следующие советы помогут владельцу продолжить лечение кошки-пациента, когда она покинет клинику.

- Найдите тихое, спокойное место для кошки (небольшое огороженное помещение) с хорошим освещением, с удобным доступом для владельца. Небольшое пространство даст животному чувство защищенности, кроме этого, в таких условиях будет легче контролировать его состояние.
- Установите режим для приема оральных препаратов.
- Давайте животному лекарства в закрытом безопасном месте. Это может быть раковина, выстланная мягким полотенцем или флисовой тканью
- Поощряйте кошку, если она соглашается принимать лекарства, давайте лакомства, гладьте или чешите.
- Существует ряд лекарств, которые требуется принимать вместе с едой (например, фосфат-связывающие препараты). Во всех остальных случаях не стоит использовать корм, чтобы облегчить процедуру приема медикаментов, особенно если это вызывает у кошки отвращение, — от этого уменьшается количество потребляемой пищи.
- Принуждение кошки к приему лекарств вызывает стресс и у животного, и у владельца. Не доставайте кошку из укрытия силой, не прерывайте процессы питания, груминга или отправления естественных нужд, чтобы дать ей лекарство.
- Приветствуйте любые вопросы и обращения от владельцев, если у них есть проблемы, связанные с уходом за кошкой дома, включая прием медикаментов. Предлагайте другие варианты (например, другие лекарственные формы) для достижения поставленных целей.
- Расскажите владельцу о поведении здоровых кошек и признаках, которые свидетельствуют о полном выздоровлении. При хорошем самочувствии животные чаще всего спят, свернувшись клубком. Они ухаживают за своей шерстью, следуют привычному распорядку, взаимодействуют с владельцем, едят и регулярно посещают туалетный лоток.

### Избегайте вещей, угнетающих кошек

- Если необходим ветеринарный воротник, остановите свой выбор на модели из мягкого материала, а не из жесткого пластика (см. **Рисунки 15а, 15б**).

### Домашний уход

- Обучение клиентов, руководство и постоянная поддержка со стороны ветеринарных специалистов приводят к быстрому выздоровлению животных, что положительно влияет на всех.
- Как правило, клиенты не владеют навыками медицинского ухода за питомцами, поэтому обучение владельцев очень важно.
- Постоянное активное общение с владельцем позволит убедиться в успешности лечения или вовремя обнаружить проблемы.
- Инструкции нужно давать в устной и письменной форме, показывать необходимые приемы на практике, а также при возможности использовать мультимедийные материалы и интернет-ресурсы.

## ДВЕ ЛЕЧЕБНЫЕ ПРАКТИКИ, КОТОРЫЕ РАЗДРАЖАЮТ КОШЕК, И ИХ АЛЬТЕРНАТИВА

Рисунок 15.

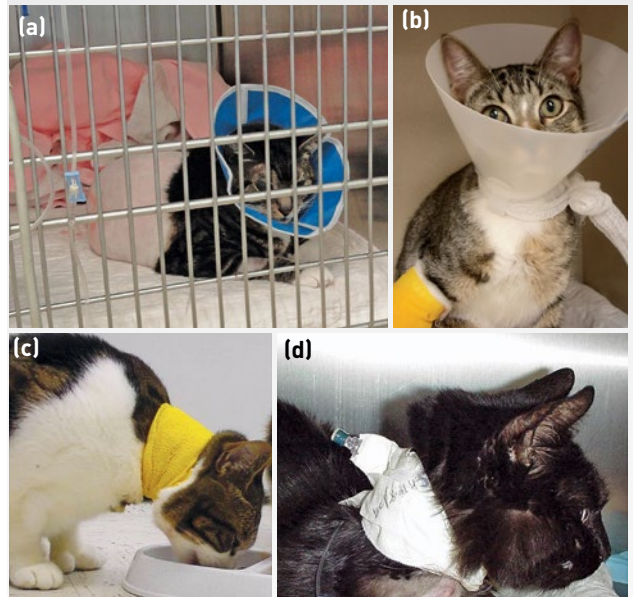

▲ Мягкий ветеринарный воротник (a) гораздо удобнее жесткого (b). Мягкая самоклеящаяся повязка (c) предпочтительнее жестких, ограничивающих движения бинтов (d). Фото Sheilah Robertson.

- Кошки не любят тугие повязки и бинты, им нравится потягиваться и двигаться свободно. Животные хорошо переносят эластичные, самоклеящиеся повязки, не ограничивающие движения. Большинство кошек предпочтут трикотажную повязку, чем жесткую или марлевую.
- Многие животные плохо реагируют на спирт, которым протирают кожу перед проколом вены. Им не нравится запах и внезапное чувство холода, возникающее при его испарении. Альтернативой может стать теплый стерильный физраствор или вода.
- Кошки метят территорию с помощью лицевых желез. Они будут делать то же самое в клетке в стационаре. Они могут тереться мордой о подстилку, коробки, стены и дверь клетки. Постарайтесь не мыть помеченные области.
- Кошки известны своей чистоплотностью и любовью к грумингу. Больные и ослабленные животные ухаживают за собой в меньшей степени и нуждаются в помощи. Уберите кровь и следы от растворов лекарственных препаратов с шерсти кошки, чтобы ей было легче привести себя в порядок. Избавьтесь от всего, что может иметь неприятный для животного вкус и запах.

## ПЕРВЫЕ ШАГИ ПО ВНЕДРЕНИЮ ПРИНЦИПОВ ДАННОГО РУКОВОДСТВА

**Найдите в клинике амбассадора, который поведет за собой коллектив.** Выберите обученного специалиста, разбирающегося в потребностях, сценариях поведения и болезнях кошек, который захочет обучать своих коллег



и клиентов принципам медицинского ухода за этими животными. Предложите ему внести свои рекомендации по изменению помещений, оборудования, процедур и работы персонала, которые повысят качество оказания услуг.

- Используйте активное планирование для внедрения принципов, описанных в руководстве. Организуйте встречи коллектива, чтобы оценить прогресс и внести изменения в исходный план (см. ниже).
- Выберите два-три принципа и сконцентрируйте усилия на них. Постепенное продвижение эффективнее, чем попытки изменить все разом.
- Собирайте ветеринарных специалистов вместе, чтобы обсудить наилучшие подходы к внедрению принципов, описанных в руководстве, отметить прогресс и найти решения для возникших проблем.

### Использование активного планирования

Простыми словами, план активности — это последовательность шагов, необходимых для достижения цели. В нашем случае это внедрение принципов, описанных в данном руководстве, в вашу ветеринарную практику. Правильный план активности соответствует принципу SMART: цель конкретна, измерима, достижима, реалистична и ограничена сроком. Создайте отдельный порядок действий для каждой из выбранных вами инициатив. План должен включать в себя:

- Цель
- Задачи для достижения цели
- Имя ответственного за выполнение каждой задачи
- Срок выполнения
- Ожидаемый результат

### ЛИТЕРАТУРА

1. Rodan I, Sundahl E, Carney H, Gagnon A-C, Heath S, Landsberg G, et al. AAFP and ISFM Feline-Friendly Handling Guidelines. *J Feline Med Surg* 2011; 13: 364–375.
2. Carlstead K, Brown JL and Strawn W. Behavioral and physiological correlates of stress in laboratory cats. *Appl Anim Behav Sci* 1993; 38: 143–158.
3. Stella JL, Lord LK and Buffington CAT. Sickness behaviors in response to unusual external events in healthy cats and cats with feline interstitial cystitis. *J Am Vet Med Assoc* 2011; 238: 67–73.
4. Greco DS. The effect of stress on the evaluation of feline patients. In: August J, ed. *Consultations in feline internal medicine*. Philadelphia: WB Saunders, 1991, p 13.
5. Paige CF, Gordon SG, Roland RM and Bogg M. Prevalence of heart murmurs and occult heart disease in apparently healthy cats. *J Am Vet Med Assoc* 2009; 234: 1398–1403.
6. Quimby JM, Smith ML and Lunn KF. Evaluation of the effects of hospital visit stress on physiologic parameters in the cat. *J Feline Med Surg* 2011; 13: 733–737.
7. Griffith CA, Steigerwald ES and Buffington CA. Effects of a synthetic facial pheromone on behavior of cats. *J Am Vet Med Assoc* 2000; 217: 1154–1156.
8. Kronen PW, Ludders JW, Erb HN, Moon PF, Gleed RD and Koski S. A synthetic fraction of feline facial pheromones calms but does not reduce struggling in cats before venous catheterization. *Vet Anaesth Analg* 2006; 33: 258–265.
9. Brodbelt DC, Pfeiffer DU, Young LE and Wood JLN. Risk factors for anaesthetic-related death in cats: results from the confidential enquiry into perioperative small animal fatalities (CEPSAF). *Br J Anaesth* 2007; 99: 617–623.
10. Brodbelt D. Feline anesthetic deaths in veterinary practice. *Top Companion Anim Med* 2010; 25: 189–194.

### Советы по разработке плана в соответствии с принципом SMART

- Привлеките к разработке плана всех ваших ветеринарных специалистов или по меньшей мере ответственных за выполнение определенных задач.
- Четко представьте себе цель и создайте список приоритетных задач для ее достижения.
- Определите барьеры и препятствия, которые могут помешать добиться цели, и продумайте, как их преодолеть.
- Составьте список ресурсов, без которых невозможно достичь цели.

### ВЫВОДЫ

- Ветеринарные клиники, которые заботятся о своих пациентах-кошках и используют приемы и методы, соответствующие особым потребностям этих животных, получают сразу несколько преимуществ:
  - Ветеринарные специалисты обеспечат более качественный уход, что упростит лечение и ускорит выздоровление кошек.
  - Владельцы положительно оценят методики, которые во главу угла ставят безопасность и защищенность их питомцев.
  - Персонал получит признание клиентов, все члены команды почувствуют удовлетворение и смогут работать продуктивнее.
- В данном руководстве реализуется всесторонний подход. Может показаться, что все это трудно воплотить. Однако даже небольшие улучшения и постепенный прогресс могут быстро принести свои плоды и заложить фундамент культуры профессионального ветеринарного ухода за кошками.

11. Perrin T. The Business of Urban Animals Survey: the facts and statistics on companion animals in Canada. *Can Vet J* 2009; 50: 48–52.
12. Volk JO, Felsted KE, Thomas JG and Siren CW. Executive summary of the Bayer veterinary care usage study. *J Am Vet Med Assoc* 2011; 238: 1275–1282.
13. Westling K, Farra A, Cars B, Ekblom AG, Sandstedt K, Settergren B, et al. Cat bite wound infections: a prospective clinical and microbiological study at three emergency wards in Stockholm, Sweden. *J Infect* 2006; 53: 403–407.
14. Palacio J, León-Artozqui M, Pastor-Villalba E, Carrera-Martín F and García-Belenguer S. Incidence of and risk factors for cat bites: a first step in prevention and treatment of feline aggression. *J Feline Med Surg* 2007; 9: 188–195.
15. Natoli E, Baggio B and Pontier D. Male and female agonistic and affiliative relationships in a social group of farm cats (*Felis catus* L.). *Behav Processes* 2001; 53: 137–143.
16. AAHA/AAFP Pain Management Guidelines Task Force Members, Hellyer P, Rodan I, Brunt J, Downing R, Hagedorn JE and Robertson SA. AAHA/AAFP pain management guidelines for dogs and cats. *J Feline Med Surg* 2007; 9: 466–480.
17. Wagner KA, Gibbon KJ, Strom TL, Kurian JR and Trepanier LA. Adverse effects of EMLA (lidocaine/prilocaine) cream and efficacy for the placement of jugular catheters in hospitalized cats. *J Feline Med Surg* 2006; 8: 141–144.
18. Kry K and Casey R. The effect of hiding enrichment on stress levels and behavior of domestic cats (*Felis sylvestrus catus*) in a shelter setting and the implications for adoption potential. *Animal Welfare* 2007; 16: 375–383.
19. Chan DL. The inappetent hospitalized cat: clinical approach to maximizing nutritional support. *J Feline Med Surg* 2009; 11: 925–933.
